# Supplementary material for: Sensory representation and detection mechanisms of gut osmolality change
Source: Springer Nature journal article supplement (doi:10.1038/s41586-021-04359-5), 2022-01-26
Supplement: MOESM5 [file 41586_2021_4359_MOESM5_ESM.xlsx]

## Sheet: 5d-Traces
	Water-Antagonist												Water+Antagonist												VIP-Antagonist												VIP+Antagonist
Frame (1.288365sec per frame)	Neuron#1	Neuron#2	Neuron#3	Neuron#4	Neuron#5	Neuron#6	Neuron#7	Neuron#8	Neuron#9	Neuron#10	Neuron#11		Neuron#1	Neuron#2	Neuron#3	Neuron#4	Neuron#5	Neuron#6	Neuron#7	Neuron#8	Neuron#9	Neuron#10	Neuron#11		Neuron#1	Neuron#2	Neuron#3	Neuron#4	Neuron#5	Neuron#6	Neuron#7	Neuron#8	Neuron#9	Neuron#10	Neuron#11		Neuron#1	Neuron#2	Neuron#3	Neuron#4	Neuron#5	Neuron#6	Neuron#7	Neuron#8	Neuron#9	Neuron#10	Neuron#11
1	-0.77576	0.356005	1.05327	-1.53457	0.435223	0.298647	-0.62577	-0.98674	-0.83367	0.541878	-0.36085		-0.616	-0.32032	-1.00222	-0.40236	-2.29028	-0.7058	-0.81798	0.769996	0.324627	0.272374	-0.28386		-1.59717	-0.0232	-2.05455	-0.00879	-0.12881	-0.10656	0.952921	-0.11444	-0.65021	0.9201	0.199373		0.524676	0.621825	0.713881	0.802044	-0.64764	-0.45964	-1.37216	1.67579	-0.76386	-0.02141	0.641116
2	-1.46539	0.235691	1.73647	-1.68535	1.35049	-0.22274	0.410251	-1.09781	-0.60085	0.081455	0.852612		1.18162	-0.75733	-1.30379	-0.6494	0.064815	-0.68206	-0.81809	-0.26906	-0.19772	0.513136	-0.89269		0.178841	1.21624	0.670785	-0.7276	-1.69663	0.756561	2.43014	1.69011	-1.5546	-0.71452	0.465023		0.214848	1.81839	0.602207	1.32978	-0.1056	2.45841	1.24003	0.104616	1.95658	1.31895	0.269966
3	1.45585	0.73702	0.291337	-0.85873	0.402581	-1.07279	-0.57352	0.130178	-1.31147	-0.35939	-0.40139		-0.82676	-0.88793	-0.51912	-0.82925	0.346675	-1.01389	-1.07481	-1.24826	0.265265	-0.73917	0.892048		0.62598	-0.85746	-0.43375	-1.26284	0.006303	0.209795	0.86013	-0.3357	-0.25634	0.040733	-1.5907		-0.01915	1.00004	2.01601	-0.4798	0.751108	1.66028	0.903063	-1.78275	-0.59413	-0.00259	1.08522
4	-0.11132	-0.14715	-0.07304	-1.24784	-0.7691	0.665378	0.1585	-0.46977	2.30282	1.17815	0.49343		0.739235	0.877248	-0.20521	-0.68437	1.2488	0.409314	-0.31087	-0.60879	0.096315	-2.08972	-1.78877		0.412269	-0.10583	0.224121	-1.02312	-0.8637	0.347391	1.00821	-0.13639	0.132094	-0.76229	0.471487		0.818887	1.55035	-1.07858	-0.37013	1.02026	0.06995	1.60736	0.27187	1.25309	1.13278	0.460637
5	-0.04065	-0.68779	-0.842	-0.27133	-1.46589	0.235573	-0.57532	-0.59602	0.885535	0.248076	-0.19835		-0.49426	0.193373	-0.63113	-1.20913	1.39033	-1.36583	-0.08587	-1.01664	-0.84859	0.295377	0.895269		2.24131	-0.11288	-0.47562	-1.96878	-0.10701	1.13833	0.754869	0.754953	1.27731	0.032057	1.37197		0.181741	0.737936	1.6668	-1.34868	0.327721	-0.16664	1.3231	0.73509	-0.28334	0.049286	-0.55445
6	0.311631	-1.9623	-0.8517	1.56465	-0.44342	-1.68132	-0.01082	-2.01932	-1.23394	0.416654	0.590518		-0.48475	-1.59899	0.168984	-1.15266	0.274592	-0.20028	0.893769	-0.00716	-0.18508	-1.01353	-2.02991		0.957732	1.201	-1.02196	-1.59806	1.48348	-0.57897	-0.81073	0.371818	-1.3415	-1.05915	-0.05781		-1.15293	-0.17501	-0.0694	0.341072	0.783568	-0.49937	0.267028	0.749103	-0.72414	0.332551	1.45363
7	0.180858	1.8104	-1.05206	1.07983	-2.02346	-1.4368	0.298621	-1.41921	-1.44871	-0.96725	-0.45511		0.569166	0.253612	-0.83954	-1.07881	-0.50188	-0.12038	0.953531	-1.99976	-1.86147	1.71564	-0.69145		-0.56569	1.81257	-0.79943	-0.10715	0.31313	1.07121	-1.06918	0.087352	0.858608	-0.66124	1.92967		-0.48332	0.164315	1.0922	2.31725	0.638007	-0.40469	0.557592	0.248658	-1.88223	0.503517	0.58533
8	0.5712	0.23066	1.05842	-0.10995	-0.48024	1.38165	0.139419	-0.79911	1.08039	0.015079	-0.68644		-0.92217	-0.81859	0.188024	-0.62202	-2.1008	1.24626	0.086202	1.037	-0.67662	-1.08227	1.24654		0.833855	0.573859	0.241766	0.827382	-1.24543	0.303449	0.3389	-0.02238	0.530439	0.925595	0.711921		-0.39787	-1.41779	-1.44288	1.97183	2.3805	-1.17536	0.19958	-0.77508	-0.12751	1.08524	-0.80088
9	0.170865	2.30803	-1.43434	0.216556	-0.80502	-0.53435	-0.09112	-0.5368	-0.15114	-1.3407	0.499746		-2.31196	-0.57429	-1.25068	-1.09427	-0.39423	-1.40721	1.19391	-0.57523	-0.55406	0.167914	1.21795		-1.0318	0.99119	0.017639	0.994906	0.647894	-0.45927	-0.73776	-0.53642	0.493362	1.51899	-1.23126		1.91204	-1.2566	-0.00997	1.07986	1.15133	-0.57604	-0.39236	1.22479	0.685769	0.374947	-0.41258
10	-1.72626	0.739399	0.064188	-0.795	-0.41777	-1.82975	-1.44579	0.327091	0.996854	1.32097	-0.8255		-0.52334	-0.8126	-0.86127	-1.13196	0.665399	-0.06699	1.39805	1.81474	0.170611	0.623947	0.121871		0.592146	-0.08511	-0.06777	0.689757	0.109802	-0.81971	-0.40474	0.182576	2.23493	1.21183	-1.65711		1.51914	-1.65873	0.501962	-0.90702	-1.70855	0.29161	0.277379	-1.49623	1.01301	0.261915	-0.85306
11	0.455975	-0.4528	-1.34129	0.605654	-0.1195	0.605754	-0.78319	0.059297	0.293256	-0.65366	-0.86863		0.001776	-0.26771	0.368388	0.591473	0.144975	-0.81784	1.91981	0.326347	-0.91527	0.773174	0.98631		-0.77698	0.079764	0.322086	-0.00023	1.67034	-1.56376	-0.28946	-1.41845	-0.03826	1.5579	-0.08499		-0.71155	0.842502	0.03072	-0.50965	-1.1109	-1.24241	0.932582	0.519052	-0.46289	-0.05199	-1.04201
12	0.201101	-1.20157	0.542888	0.22186	-0.43301	0.877493	0.034678	0.129129	-0.90674	-1.43582	3.03208		-1.58421	1.87088	-0.30086	1.65514	1.12312	-0.64917	1.41408	-0.17446	1.22652	1.07668	0.10716		1.18878	-0.65663	-0.06291	-0.27123	-0.30698	-0.82031	-1.45133	-1.64631	-1.53566	0.26672	0.576781		0.284306	0.528555	-0.29865	-0.4832	-0.23514	0.677102	0.415857	0.054869	-0.02808	-1.44529	0.3027
13	-0.5637	-0.42026	0.176306	-0.19912	0.047991	0.537482	0.369068	1.37552	1.16017	-0.74114	0.769601		0.27571	1.16309	0.07549	1.65285	0.810821	0.549543	0.570671	0.062798	-1.21257	-0.24011	0.717089		-0.00694	-1.71319	1.18242	0.267963	0.065965	0.706386	-0.58446	-0.23016	-1.0979	0.869611	-1.2869		0.105738	-0.71942	-0.72144	-0.66441	-1.19856	1.34111	-0.58169	1.34945	1.61404	0.120225	-0.12122
14	0.842063	-0.77462	-0.08234	0.416994	1.63772	1.74715	-0.45809	0.50989	-0.95654	1.2	0.326239		0.049217	-0.9999	0.058321	0.2501	0.562257	-0.19979	-0.04115	-0.23506	-1.21224	-0.11069	1.05079		-0.40573	-1.67548	0.813732	1.15714	-2.02852	0.046005	-0.42775	1.69115	-0.09186	-0.49478	0.114324		-0.89669	-0.99336	-0.91689	-0.05026	-0.02201	-0.23398	-0.05965	-1.21848	0.694143	-0.09191	-0.7174
15	0.291494	-0.66349	1.97992	-0.15585	1.08807	-0.09592	-0.87527	0.615298	0.135245	-0.34232	-1.16294		1.06051	1.217	0.425167	1.18791	-0.23204	1.39003	-0.25715	1.20123	0.441661	-0.92351	-0.82626		0.558833	-1.07113	-1.55641	0.687963	0.444891	-0.25687	1.19347	0.472789	-0.76899	-1.32998	0.254294		0.310991	0.265154	1.38437	-0.51996	-1.25815	-1.37982	0.440632	0.346244	-0.73278	-2.82993	-1.00894
16	-0.86625	-0.72759	-0.49026	0.745073	-1.08923	-0.263	0.553107	0.722683	-0.38108	-0.95395	-1.21321		1.10535	1.79733	0.197735	0.867662	-0.83976	0.526431	-0.85266	1.67609	1.69569	0.756663	0.560559		-1.3228	-1.45275	-0.41494	1.26649	1.56096	-1.77867	-0.31376	-0.77085	0.014265	-1.79619	-0.22217		1.7305	-0.28618	-0.80845	-0.5084	-0.55476	-0.77474	-0.23749	-1.0974	-0.11133	0.210676	-1.17996
17	1.73617	-0.34324	-0.76734	0.586525	-0.03802	-0.07237	-0.75889	2.11441	-0.05144	1.78734	0.338767		0.75988	-0.24394	-0.29769	0.867423	-1.13166	1.55962	-1.03715	0.59344	1.83079	-0.38481	-0.02087		-1.12681	0.041614	0.571212	1.72679	-0.59617	-1.11536	0.343679	2.02313	-0.4883	0.774806	-1.27158		-1.00135	0.215472	-1.41706	-0.66725	-0.2133	-0.3096	-0.8416	-0.8527	0.091803	-1.44678	-0.51762
18	-1.96991	1.08518	0.99235	-0.69135	1.42047	1.0515	0.298402	0.920654	0.980863	1.53567	0.809351		0.908583	-1.1069	2.25785	1.15766	0.224449	1.70949	-1.16163	-1.35495	-0.29814	-1.59992	0.187544		-1.20826	0.787461	2.46811	0.104467	0.66351	0.79016	-1.6593	-0.05012	0.731873	-0.13053	0.298035		-0.17825	-0.23217	-0.48604	-1.04118	-0.29884	-0.03324	-1.41915	0.512203	-1.5926	0.504831	-0.88682
19	1.28308	-0.17664	-1.08661	-0.14199	0.939977	0.643273	0.370198	0.201703	0.14952	-1.11117	-1.16626		-0.38332	0.580072	1.0863	0.541353	-0.03749	-1.1702	-1.24166	-0.13265	0.685922	0.707522	-1.428		0.678066	0.752615	0.845971	-0.82366	-0.55864	2.39022	0.176934	-0.56606	0.423459	0.147191	-0.29353		-2.06931	-1.42705	-0.51478	-0.11871	-0.60024	-0.32903	-1.40058	-1.11281	-0.55448	0.921573	0.594725
20	0.018942	0.055053	0.125813	2.25394	0.762121	-0.83485	3.56554	0.81893	-0.10907	-0.41987	-0.37367		1.49572	0.435898	2.38523	0.082655	0.671894	1.00873	-0.73099	0.14037	1.22436	1.28129	-0.02133		-0.22564	0.297341	-0.4705	0.06861	0.565602	-0.26003	-0.3108	-1.44661	1.12727	-1.31685	1.30317		-0.69246	0.421777	-0.244	-0.1732	0.901197	1.0861	-1.85951	0.543719	0.548942	-0.9266	2.70161
21	1.347	-1.47499	-0.88633	1.5879	1.05419	1.7673	4.44844	2.35891	2.11927	2.12642	7.01515		-0.06412	-0.65618	3.72362	1.06934	1.10358	0.357158	-1.25942	-0.26156	-0.8971	-1.14814	-0.41913		1.33648	-0.46203	0.058453	0.018392	-1.26624	1.77755	-0.56695	-2.64785	0.601742	0.914109	0.854733		-0.36705	-0.46588	-0.04474	1.75808	0.112235	-0.76322	-1.7554	1.11944	0.468438	0.604613	7.07748
22	1.10765	-0.9939	0.878686	0.694798	0.855674	0.502108	1.3329	1.07661	-0.02806	0.150225	7.45001		-1.77533	-0.07382	3.94806	0.477196	-0.86203	-0.56887	-1.22935	-0.31531	-1.96039	0.653424	0.55363		-0.4594	-2.0115	-1.09104	-0.41963	0.226699	-0.83048	-0.44554	-0.3426	0.906218	-0.68003	1.27971		1.23271	-0.58217	-0.61482	4.80901	-0.36473	-1.89284	-1.86059	0.032258	0.341758	0.392818	2.35074
23	-0.71691	-0.1895	-1.3874	-0.12251	1.46846	0.622236	-0.72882	-0.57957	0.938626	1.41504	2.49508		0.577166	0.362068	1.13112	0.615971	0.428548	1.28549	-1.2081	-0.58242	-1.37945	-1.01569	1.17195		1.09216	-0.47486	0.93849	0.070784	-1.18854	0.648916	-1.1311	-1.17253	0.89587	-0.72734	0.356566		0.598702	0.89914	0.534901	4.32351	0.443144	-0.76322	-2.12531	3.33668	1.37096	-1.04298	2.43275
24	-0.48058	-1.22115	4.93005	0.529382	1.20032	1.46975	1.58913	0.096952	0.104774	0.581421	2.33685		-0.46174	-0.59262	0.742928	-0.33255	2.72973	-0.89034	-1.63594	0.264657	-1.20367	0.19774	-1.44638		-1.53534	-0.54458	-0.30281	-0.25625	1.55054	1.28279	-0.77595	1.39051	0.036444	-0.03997	1.2048		1.13125	-0.76809	-1.00706	2.52879	0.124815	1.37772	-1.96027	0.865592	1.03957	0.570075	0.573057
25	-1.30493	1.10941	1.08591	0.665308	-0.12279	1.32804	-0.02735	0.67673	0.935347	0.71292	-0.45079		-2.96147	0.487886	0.861948	-0.71996	-0.77636	-0.60167	-1.68055	0.003523	0.327289	-0.80413	-2.14925		-1.00585	-1.68526	0.300225	-0.52179	-1.19285	-0.22345	0.268753	0.813185	-1.468	-1.275	-0.09222		0.99199	-0.45428	-0.97977	1.31217	-0.67706	-0.33789	-2.15679	1.38198	-0.96852	2.36524	0.850668
26	-0.44181	-1.26458	-0.79728	1.06894	1.29016	1.04507	0.37	-0.22824	0.682669	2.44744	0.391883		2.36919	0.805243	-0.23056	-1.35478	0.825438	1.14993	-1.685	0.082653	1.21309	0.603983	-0.39375		-0.33152	-0.92371	-0.46665	-0.66268	0.048161	0.482663	-0.5829	1.41199	-0.59119	-0.08888	-0.34294		-2.35458	-0.4847	0.918945	-0.2655	0.295392	0.055294	-2.1622	0.571138	-0.30468	1.43516	0.387765
27	1.02042	-0.37706	2.01668	0.924982	0.495126	0.733635	-0.19164	0.046335	0.316197	0.840774	0.483331		-2.14576	0.1682	0.266146	-0.33824	-1.58625	0.645941	-1.72397	0.088087	-1.22736	-1.36135	-1.51076		0.601615	-1.13501	-1.45396	-1.11581	0.52826	0.571284	0.866542	4.36496	0.59376	0.171838	-0.22137		0.728881	-0.74655	0.285311	0.35568	-0.32983	-0.19837	-2.2738	0.422572	0.941069	2.68175	-0.78373
28	-2.44287	-0.01601	4.90815	2.46297	1.78507	2.83072	0.822352	-0.15188	1.03409	2.23177	-0.47808		-1.37421	-0.7095	-0.37565	0.144208	-2.11356	-2.50628	-1.6995	-0.75108	0.598757	1.81031	-0.06221		0.625413	0.091928	3.50499	-0.8371	-0.6223	-0.72916	-0.23594	4.44077	3.68398	0.029319	0.053287		-1.90404	-0.37087	-1.19494	0.82873	0.44879	-2.83394	-2.39615	0.622129	1.50887	1.67144	-1.325
29	0.228429	-0.3839	3.12199	2.84663	1.7502	0.330405	-0.27716	1.02601	0.672335	0.682302	0.703017		1.3697	-1.03367	0.344291	0.057641	-2.22682	0.435585	-1.53129	-0.44657	-0.97038	-0.66687	0.454938		0.043265	0.066216	-0.26701	1.23079	1.11992	0.763403	-0.19607	3.90723	-0.17952	-0.2645	0.462766		0.284331	0.659035	1.77955	0.466838	-0.51072	1.29795	-2.15526	1.56753	0.540792	2.58441	1.31889
30	2.94702	-0.66297	2.28894	2.57183	1.35522	2.26173	-0.02417	1.66519	0.592024	1.50532	-1.15953		-0.84079	0.635073	-0.08002	0.224924	0.516672	-0.2946	-1.45964	-1.15196	-0.19441	0.286734	2.02713		1.34402	-1.12107	-0.29086	-0.52357	0.087508	3.01599	0.112248	4.99069	-0.13859	1.68092	0.152713		-0.37158	1.3081	0.338076	0.328959	-0.35895	0.864222	-2.34536	0.322573	1.43054	0.145181	-0.16532
31	0.068707	-0.1627	1.23977	1.27505	1.43302	0.075482	0.306516	2.08853	1.49466	1.10475	-0.06588		0.669191	1.30228	-0.23416	0.111191	-0.75306	0.000741	-1.33677	0.311866	1.16834	-0.54746	2.4628		0.299561	0.765295	0.263795	-1.14835	1.86371	1.15248	0.312094	3.82072	0.299171	-0.85785	0.853829		-0.52161	-1.59533	1.17603	-0.91845	-0.84737	2.41743	-2.29825	-1.04952	0.353295	0.645506	0.016426
32	0.749489	0.646984	-0.17143	2.22788	3.77547	0.147232	-1.1823	0.334144	0.48077	1.08878	1.28148		1.16358	-0.93289	0.308367	-0.27262	-0.3298	-1.37887	-1.67625	0.158443	-0.48096	-1.85064	0.525757		-0.93686	0.889914	-0.52777	-1.15512	0.647585	1.60546	0.730406	2.22165	2.45722	1.17669	0.269055		-0.97541	-0.69948	0.448593	-1.33154	-0.9625	1.55424	-2.28777	0.361802	-1.31378	0.166268	0.602405
33	-1.38508	-0.76901	2.40226	2.83995	0.927282	-0.1803	-0.89726	0.552919	3.18585	1.07311	0.427959		2.45852	-0.23103	0.078954	0.355376	0.421039	0.02206	-1.62651	-0.22343	0.217808	0.626357	1.91278		2.17712	1.26803	-0.20694	-0.02247	-0.20953	-1.17738	-0.84922	2.27437	2.22464	0.769234	-1.59247		-0.31311	-1.2426	-0.29135	-0.81676	-0.38531	-0.57588	-2.31638	-1.27397	0.282665	0.124976	0.259656
34	0.007136	0.737484	2.04633	3.18765	1.75613	-0.00809	-0.67236	2.26261	1.29958	1.31109	-1.67627		-1.94423	0.996525	-0.19178	0.768869	-0.72326	-0.20737	-1.47804	0.396841	0.445202	0.44052	-0.47911		0.552274	0.765677	0.90923	0.982808	0.111448	-1.37703	2.05036	1.29945	-0.81817	-0.28554	-0.569		0.011976	-1.18029	-0.8115	-0.89383	-1.50258	0.971915	-2.13154	-1.24268	0.014351	0.488218	-0.17425
35	-1.69402	-1.13843	-1.21306	1.58812	2.245	1.75307	1.43097	1.42251	0.88993	4.46084	-0.58458		0.203635	-0.22814	0.978475	-0.63828	-2.01647	-0.48675	-1.3651	0.735969	-0.17066	-0.83968	-0.18871		0.421569	-0.18817	-1.32258	0.66434	-0.41569	-0.95831	2.00747	1.48346	2.76543	0.126478	-1.77386		-1.13616	-1.14565	0.549347	-0.71323	-0.165	1.36841	-2.37709	-1.19386	0.188182	-0.44659	-0.0945
36	-0.9171	0.861775	-0.15041	2.36234	3.74941	3.07664	1.15192	0.636987	1.6039	3.41264	-0.61243		0.677327	-0.93989	-1.06655	-0.09198	-2.90251	0.223246	-1.0981	-0.31862	-0.55057	-0.0109	-0.21587		1.34485	-1.43996	0.569188	-0.31108	0.476978	-1.59889	1.31215	-1.0161	0.448038	-0.286	-0.80514		-2.04858	-1.64159	-1.03948	-0.71119	-0.14476	-1.84099	-2.32882	-0.62571	-0.09188	0.491172	1.50529
37	1.11031	-2.11725	0.67385	2.01969	1.17048	1.84513	2.09715	2.75428	1.83244	2.5054	-0.05217		1.98101	1.54745	-0.1916	-0.27778	0.431088	-0.42035	-1.46392	-0.35854	-1.67458	-0.4475	0.18793		2.19617	-1.3159	-1.47343	-0.99215	1.79559	-0.1739	1.24571	0.087371	3.93609	1.27819	11.8565		-1.27123	0.873247	-0.54681	-1.09347	-0.09406	1.23378	-2.32756	-1.3662	1.57509	1.65016	0.343927
38	0.038398	0.822737	-1.17757	2.00008	2.33862	2.42982	-0.55314	0.731333	0.800838	2.84096	0.308596		2.58882	-0.92312	-0.13586	-0.9088	-0.31806	0.912162	-1.65983	-0.19387	-1.7639	-0.45045	0.112915		1.59349	-0.71333	-1.06692	-0.24373	2.86286	-0.00677	0.565213	-1.76521	3.23154	0.62836	7.93857		-1.98367	-0.49548	-1.5352	-1.57444	-0.19201	3.02111	-2.26764	-1.50634	0.719079	1.41837	-0.82483
39	1.20531	0.088092	-1.25009	2.73234	1.0168	1.53006	4.04456	2.46813	0.557147	0.388353	-0.13543		0.629086	-0.1724	-0.59132	1.59617	0.797705	0.708194	-0.63393	0.003861	-0.58625	-1.80749	-0.76296		-0.0931	2.65929	-0.68954	-1.67352	1.9756	0.261403	0.806223	-2.20203	1.25733	1.0391	4.20735		0.060993	-0.62027	-0.28508	-1.09387	-1.45313	1.73338	-2.28708	0.666537	-0.23693	0.852804	0.138902
40	-0.24235	0.775418	0.958274	1.52343	1.59896	1.43236	6.53022	1.61991	1.58314	0.792184	-0.33094		1.16528	0.454378	0.014455	0.484997	2.15567	0.080954	1.40429	-0.44962	1.11274	0.49304	-1.29514		0.441477	1.9403	0.603284	-0.33601	1.99601	1.39935	0.280687	-0.22181	1.58771	1.38105	3.84607		-0.05317	-1.11691	-0.17273	1.44958	-0.78691	2.87479	-2.28951	-1.28913	-0.76877	1.15105	0.474275
41	0.587525	-1.13048	0.715695	1.93143	4.3189	1.92794	5.29458	3.0339	1.05192	1.52438	-2.20149		0.966258	-0.01745	-0.4978	0.144244	-2.81877	2.11322	1.19229	-0.21305	1.35345	-2.0845	0.283264		-0.12504	4.27771	-0.84308	-1.25121	1.8719	-1.56747	-0.62644	0.255753	2.5208	2.15722	1.04479		-1.0446	-0.71117	-0.63997	0.871209	0.13211	-0.07959	-2.29786	-1.70046	2.13684	2.21609	0.069428
42	1.29801	1.76825	-0.80046	2.94689	2.90814	2.38604	7.13568	3.81479	1.606	2.55498	-0.62862		3.02417	0.532835	-1.14153	-0.25673	-0.25845	2.1877	1.21977	-0.04384	1.08903	-0.47609	-0.12087		1.08587	5.2522	0.520528	-1.43205	2.95833	-0.67154	0.48749	0.757442	1.90521	0.702215	1.19454		0.509891	-1.11187	0.217502	1.01484	0.282282	-3.53621	-2.15764	-0.93834	-0.49222	1.11878	0.103843
43	-0.66029	-0.70179	1.92169	2.46167	2.14598	2.5767	7.53554	2.81048	2.25272	0.373492	-0.719		1.98739	-0.0631	-1.6791	-0.60011	0.491936	2.59297	1.15997	0.711548	0.482142	0.917749	-1.01571		-0.1316	7.92536	3.26127	-1.24261	3.3795	-0.45298	1.61628	3.63309	2.08328	1.65134	1.3073		-1.70884	-1.79183	-1.73143	0.236251	0.124803	-0.437	-1.95124	0.15173	0.225159	2.19754	0.179901
44	0.568614	1.52404	-0.52426	0.160357	0.165732	3.21724	9.59813	4.90473	1.58989	1.08925	-0.74423		0.190035	0.26493	-1.16991	-0.66676	1.13069	-0.62553	0.412804	-0.09695	0.912429	-0.03825	-0.69773		-1.38874	7.75678	-0.61883	-2.04822	1.26839	-0.33712	1.77955	0.366785	0.788382	0.519428	1.63481		-2.45978	-1.66431	0.948598	-0.76528	0.967625	0.696877	-2.29167	-0.78365	-0.37615	1.79471	0.308811
45	2.72316	-0.68961	1.00845	6.15332	2.71274	4.95089	6.01355	2.04222	1.04278	0.407955	-0.45934		0.684462	1.0877	-0.71408	-1.35644	0.935255	-1.71053	0.143902	-1.05293	-1.32023	1.28496	-0.00519		1.3116	7.84275	0.40032	0.959264	2.51506	-0.02374	-0.21241	0.463036	2.50421	0.736925	-1.15065		-2.71758	-1.34069	-0.24531	-0.90486	-0.54651	1.26232	-2.15055	-0.02773	1.65245	0.069479	0.465369
46	4.37878	-0.54716	0.043776	6.26142	1.80762	6.00663	4.27665	2.64862	2.74089	1.72301	-0.22699		-0.9066	-0.24859	0.030613	-0.82754	-1.92217	2.43747	0.947216	-0.85941	-0.33276	-1.143	0.77288		0.207885	10.0123	-1.3426	2.14414	3.15368	-0.53243	0.082881	0.347615	1.47801	-0.30473	-1.65549		-0.89645	-3.68772	-3.09099	-1.76648	0.30194	0.961803	-2.25504	-0.56841	1.78704	1.2226	0.219483
47	12.0186	-0.58912	7.52373	4.65904	3.19857	4.18926	6.50408	7.60666	3.46995	1.7574	-1.82344		-2.03211	-0.06538	-0.42096	-0.73181	-2.00908	4.75115	0.672142	-1.0613	1.02609	-2.4916	-1.16373		0.868052	9.07254	-0.81982	0.33482	4.57672	-0.35245	0.159414	-0.19476	1.45137	0.86222	0.480084		-3.18495	-1.09857	0.633514	-1.83811	0.69548	1.19404	-2.43685	-0.90125	-0.43067	0.774178	0.038635
48	16.2392	2.07497	4.6074	4.96528	2.98793	6.21372	8.48212	7.79821	1.01815	2.87487	-0.33217		-0.18844	0.303646	0.109045	-1.25683	-0.30012	-0.56643	0.489124	-1.23084	-1.01838	-1.18548	-1.48776		-0.37269	8.31535	0.189151	-0.12801	6.47304	-0.45425	1.79154	-0.98093	1.33461	0.250209	-0.24808		-1.57745	-1.89302	0.123361	-1.84525	0.434818	-0.88324	-2.23302	-1.36826	-0.46946	-0.14458	0.131437
49	23.5659	0.359499	1.41256	4.15998	1.231	6.94311	7.1779	3.71543	-0.419	0.542516	0.161567		-0.1887	-1.40157	-0.44468	-0.14267	-0.48898	-0.84824	-0.08225	-0.95619	1.28305	-1.00414	-1.55818		-0.52626	9.95957	-0.96873	-1.34741	3.70499	0.341879	1.61948	2.49042	3.70334	-0.51466	0.246444		-1.68944	0.206945	0.157317	-1.6735	0.983836	1.08213	-0.34245	-0.23894	0.288918	0.902396	-0.3551
50	29.4763	1.02407	1.54748	3.29355	0.424477	9.01241	3.47652	3.53082	3.28952	3.36516	-1.31401		2.41405	1.01167	-0.5716	0.42163	-1.91005	1.92046	-0.23047	-1.15112	-0.62324	-0.6071	-1.0264		-0.43823	11.0507	0.94975	-1.6105	4.82498	0.555576	3.16743	1.94096	1.65194	1.37078	0.368523		0.365138	-1.62798	0.565717	-2.06659	0.932625	0.953688	-0.50101	-0.34893	0.408784	-0.30524	-1.38365
51	34.4697	1.5711	0.288606	2.89101	0.475422	8.50854	1.1456	6.91731	2.87743	1.50605	-2.70599		0.625967	-0.43431	-0.42948	0.636825	1.03958	1.37866	1.09573	-0.58451	-0.55063	-0.14321	-0.17623		0.59981	11.5881	5.84436	-1.22853	5.73298	-0.02436	5.11562	9.58188	3.00806	-0.6773	-1.17204		-1.63043	-0.70899	1.44173	-1.52435	0.612706	0.517483	0.397603	0.081821	-0.21049	1.32736	-0.90665
52	45.7435	2.04631	0.997064	2.76352	-0.14875	9.16997	0.068351	7.51004	1.05243	2.79342	-0.66464		-1.92077	0.461023	-1.2286	2.09716	0.017296	1.24901	0.99627	-0.40404	0.554771	-0.86822	-1.45197		-1.1168	12.2662	3.81007	-0.90833	7.73605	-0.56935	7.69822	18.3973	2.45323	0.709475	-2.02802		0.411765	-0.63222	-0.11278	-1.59092	-0.11593	-0.40986	0.5841	-0.34325	1.20805	-1.25323	1.14952
53	54.454	0.820135	-0.0337	2.65473	1.64407	9.11654	1.3933	4.9359	2.31406	0.519505	-0.86626		-2.89344	-0.16693	-1.01921	1.92797	-1.01086	0.565456	0.504402	-1.03108	-0.66875	0.807287	-0.79273		0.818953	9.36291	2.77994	0.324678	6.53542	-0.25753	13.4117	15.5695	0.551888	1.36482	-0.3735		-3.02035	0.013055	-0.27836	-1.30842	1.59237	-0.16162	0.059511	-0.9035	0.692492	-0.43115	-0.09609
54	52.3703	-0.3083	2.30787	1.6704	0.928676	8.20688	1.63367	2.93136	1.64396	0.745826	1.31551		-0.60067	-0.74502	-0.65511	0.812207	-0.02786	0.319428	0.703843	1.06129	0.632354	0.589026	-0.88848		1.96422	11.2089	0.4817	-1.64096	5.71247	-0.51043	12.7645	23.6669	1.59806	0.754651	0.026536		0.215582	-0.73658	-2.31821	0.736112	1.00137	-0.94819	-0.19684	-0.16025	0.042542	1.67332	-0.06281
55	54.4782	1.98533	1.82356	4.36086	2.78412	9.64025	1.49105	2.3759	1.68689	1.19362	0.233287		0.625924	1.4604	-0.65586	1.01282	-0.43939	0.76177	-0.20852	-0.49504	-1.19582	0.621766	0.631272		-0.90023	9.41352	-0.41651	-0.78616	6.43446	0.81777	17.0909	29.9347	2.26626	2.08851	1.01001		-0.77845	-1.57288	-2.25389	0.062383	0.38268	0.532471	0.594671	-1.05201	-0.09344	-1.02403	-0.21499
56	57.9333	0.969039	6.71622	1.91254	1.74415	8.96234	1.25995	3.02557	-0.02354	0.524006	-1.68168		2.70535	-0.3234	-0.25913	1.86428	-0.45523	-0.13914	-0.43875	0.338373	-0.3853	0.371865	-1.27063		-0.36766	10.1275	1.53182	1.30852	5.48916	-0.15874	11.8941	31.1097	1.03077	0.644256	-1.45992		-1.41108	-0.81611	-1.55884	1.00142	0.585042	-0.24816	0.400827	-0.35896	0.18683	0.777613	-0.52437
57	56.7741	1.88996	4.38285	2.33518	2.9457	8.9515	0.986587	1.85431	3.64031	1.30519	-1.59834		0.660032	0.923241	-0.23461	1.01992	-1.22662	0.034636	-1.03804	-0.14148	0.139034	1.59543	-1.02793		-1.45887	10.5206	0.278426	2.67271	5.66662	0.853291	6.89321	28.8048	2.66423	1.12914	10.6857		-0.49042	0.233544	-1.16124	0.179214	0.104539	-1.24124	1.01879	0.743885	-1.00265	0.969244	-0.20702
58	57.7458	5.41759	1.16493	5.61611	3.07684	8.04932	0.650295	3.76303	1.91333	3.60304	-2.0037		-0.15819	0.340685	0.395689	1.04314	0.291744	3.07242	0.651941	-0.54573	0.262228	-1.15048	-0.09551		1.18277	6.68342	5.85791	3.41734	7.98259	2.43445	5.19651	25.9967	2.42435	2.26314	20.6258		-1.43763	-0.32026	-0.71003	-0.28369	0.560649	2.70111	0.753997	-0.75099	-0.06988	-0.73284	-0.21598
59	56.1669	5.02589	0.348281	5.32053	2.82557	6.66246	-0.36703	0.795831	3.48357	1.58743	-1.67447		-0.16241	-0.33088	0.205092	0.945267	-3.18199	1.69211	1.43493	-0.12534	0.3636	-1.32303	-1.6239		4.29913	9.15618	6.83952	4.26937	5.80924	3.98523	4.55321	30.1772	0.412654	0.232987	12.4522		-0.74722	-0.07634	-2.92988	-0.57757	1.03137	2.91539	1.2484	0.111999	-1.68477	0.627156	-1.17883
60	57.7488	8.05784	0.646697	2.97681	4.06018	9.07372	-0.05501	2.23755	3.83943	2.53854	-1.23227		-0.86394	0.08226	0.071358	0.018745	-0.52292	2.40588	1.01686	-0.07434	1.74711	0.795475	-1.68018		9.9341	9.35188	2.74718	2.97802	6.55383	5.38179	5.8391	32.2687	2.07176	0.360679	8.46477		-1.88318	0.059528	-2.48732	-1.65669	-0.07419	2.48576	1.34168	-1.54381	0.520648	0.687022	-0.21478
61	63.0065	8.45256	1.07586	2.84183	1.37582	8.96745	-0.68238	3.89288	2.38987	4.14271	1.89221		1.01083	-0.54656	-0.1692	2.73647	0.724345	2.33526	0.039453	0.31619	0.812653	1.79259	-0.06566		17.6371	8.90755	4.46149	1.758	6.3187	6.53897	7.56072	33.0695	3.56631	2.72658	5.84026		-0.04435	-1.68356	-0.60525	-1.53895	-0.13559	0.090802	1.20848	-1.14874	-0.25439	-0.39373	-0.74207
62	45.6023	11.5273	2.69638	2.87938	2.93662	5.43996	-0.73873	4.02642	2.33623	0.864753	-1.54766		0.73723	-0.73529	0.341225	1.70002	2.78644	-0.68032	0.628963	-0.40326	1.06039	1.3299	-0.24775		24.5331	5.27086	5.82661	2.32331	7.42368	5.44433	15.2469	30.3828	-0.36377	4.13148	2.1865		-1.09668	0.855259	-1.79798	-1.45386	-0.18234	-0.54539	0.606088	-0.81546	-0.65808	0.152974	-0.11384
63	33.8971	11.9971	3.68222	4.07002	1.21991	6.17348	-0.78807	3.90849	1.90835	4.65635	13.2031		0.885164	-0.52042	-0.4594	0.475675	2.65899	-0.1382	1.42624	-0.197	0.218644	0.483814	-0.37221		30.198	5.29709	15.7302	2.16214	6.13732	6.03424	14.5291	33.7829	1.20806	4.48699	2.78603		-3.56785	-0.32009	0.681153	-1.51333	0.03358	-1.24048	0.853384	-0.95461	-0.68882	-0.06628	0.049047
64	21.918	11.3562	0.885493	4.35136	3.02306	2.98845	-0.92229	2.61939	2.03093	4.95719	23.7771		-0.29924	0.35333	-0.55227	-0.57157	2.59434	-1.01391	1.93255	0.12076	2.36414	0.7514	-0.86116		38.8525	3.79512	16.0214	2.69396	4.18156	6.46654	17.0388	30.977	1.21621	1.07912	-0.31398		-2.61724	-0.30377	0.506972	0.256376	0.084812	0.382096	1.17311	5.32066	-0.27861	0.245915	-0.74397
65	16.5602	16.358	2.04952	3.51178	4.23168	0.798426	-2.0695	1.56662	2.36412	3.32094	27.6151		-1.31272	0.394369	-0.04374	-0.05858	0.500991	1.88396	1.89725	-1.56053	0.246054	0.509673	-0.5585		45.6231	2.75073	15.7602	3.6274	5.03381	7.13279	14.6311	32.2228	1.13264	6.10178	4.42459		-1.28959	-1.30929	-0.3477	1.64527	-0.31602	2.62302	1.30485	13.1085	-0.00329	-0.89775	-0.47945
66	8.69636	13.782	2.30754	4.31447	4.94315	2.25123	-0.36448	2.69121	3.60207	3.22227	26.3244		1.51514	0.113998	0.219685	0.334952	1.31676	-0.13123	1.9635	-0.11181	0.303247	0.354421	-0.01506		46.4124	0.94878	16.0344	3.77701	3.06561	9.12681	17.001	29.7241	4.38644	8.04177	1.06167		-2.51148	-1.26135	-0.31059	1.13259	0.533817	-0.67864	1.18477	15.3936	0.676448	-1.38378	0.843938
67	8.18946	17.3902	5.38205	7.2003	3.20822	0.859168	-0.73416	5.01643	2.71441	1.77224	26.7846		0.584025	-0.37356	-0.83816	-0.37025	3.98281	1.7491	1.72882	-0.78051	2.35002	-0.42655	-0.36391		45.5059	1.80038	13.9921	2.67681	5.15537	7.65519	18.7352	33.071	4.24111	8.88186	-0.12164		-2.21056	0.508819	-1.34645	-1.07967	-0.43734	-0.75408	1.39486	14.286	0.524945	-0.84303	0.828844
68	5.77139	18.488	3.79869	6.06606	4.50696	1.54114	0.790803	2.5438	4.34891	2.39192	23.2278		-0.96298	0.44087	0.128649	-0.00777	2.84154	3.21365	1.71273	0.793019	1.40921	-0.61031	-1.56635		47.4985	-1.37563	23.847	3.50592	4.4361	9.23069	23.2442	34.4902	3.92378	10.2079	-0.52488		-2.50123	-0.12082	0.264231	-1.75249	-1.28386	-0.52028	0.592413	18.5276	0.835245	0.032926	0.338757
69	4.2068	18.0025	2.76523	4.60897	6.38286	0.986465	2.41405	2.71271	3.1979	4.96464	22.9856		0.268112	-0.26701	0.582346	0.189504	3.1111	2.51898	1.66047	0.716794	0.230357	0.93777	0.872282		53.0394	0.381506	27.1999	3.68584	4.95493	7.88158	22.9893	33.5501	5.65944	10.7881	-0.77549		-0.95311	-0.15976	0.084265	-1.98366	0.498107	0.625971	1.01882	20.5013	1.17354	-1.21783	-0.41193
70	5.12818	19.5723	2.37863	4.36932	3.7924	0.692122	6.69533	1.66177	4.59895	0.61372	15.3873		-0.15186	0.249876	0.12735	-0.3875	4.20187	0.807892	1.29987	-0.18828	0.099801	-1.99386	-0.59627		50.8519	1.00997	25.9595	3.08355	4.60679	5.6582	23.7863	34.2556	3.326	5.9316	0.272328		-0.94399	-0.49701	-0.32528	-1.98515	0.16376	-0.72188	1.63141	21.3721	-1.1579	-0.80178	0.098923
71	2.66282	20.0782	6.59257	2.81261	3.82186	1.62545	2.95174	0.684994	3.17971	2.99246	8.20907		-0.64279	-1.22568	0.930917	0.565538	3.72866	1.09482	0.623879	-0.15654	1.20804	1.98585	-0.12371		48.8792	1.81426	32.5522	3.31569	5.40032	7.80078	23.2407	34.4697	5.35756	2.99799	-0.83712		-2.60416	1.0932	1.3814	-1.5466	-0.0883	-3.32281	1.70853	18.3231	1.08032	0.868618	0.614251
72	3.79223	18.5871	7.2495	4.62886	4.60626	-1.04321	2.36376	3.14256	2.33702	3.80415	8.24116		1.36038	-1.87696	-0.2326	0.34153	2.02065	2.52694	0.353344	-0.5898	-0.83651	0.875482	0.294924		48.9818	0.960963	26.0275	3.8535	3.57797	5.29337	19.6511	33.6139	2.66391	1.4074	-0.55774		-3.48896	0.68506	-1.12665	-2.34022	0.147499	1.56186	1.77581	14.7833	-0.33467	0.056299	0.520129
73	2.58512	18.5843	8.23092	3.9851	2.70939	1.73383	6.93758	4.40675	2.91858	5.4336	5.32963		-2.5061	-0.18429	-1.26187	0.252564	-0.6094	3.08268	-0.10611	1.69604	-0.41409	-2.41374	-0.03088		33.244	1.44479	31.1051	3.63555	5.95932	4.13716	23.2923	34.9967	5.7457	1.31125	-1.90235		-1.74933	-0.6601	-0.98936	-2.09909	0.382352	-0.03936	1.94902	13.8144	1.09874	0.467458	1.71667
74	2.51485	17.1678	13.7265	5.56984	4.33331	3.0019	6.06843	2.96788	2.58803	3.38336	2.55199		-0.02454	-0.35024	-1.05857	-0.18358	-0.82311	2.78529	1.59728	0.545864	-0.45487	-1.52307	-2.15402		16.3816	1.76235	26.9005	4.15667	6.17332	2.17136	22.4261	30.0089	2.46513	4.40477	0.406618		-1.78505	-0.27757	-0.43068	-2.27238	0.448368	2.66397	2.01112	13.5949	-1.10192	-1.0224	0.479347
75	3.46169	20.1193	14.9929	10.3125	2.83518	2.10988	8.71394	3.22229	2.98528	3.35076	1.55277		-0.80942	-1.07472	-0.82515	-0.22483	-0.73485	1.76024	0.723454	2.78525	-1.21551	0.699458	-1.0885		10.1131	0.938119	25.4836	3.40745	2.92844	1.04246	25.8123	30.4444	1.54968	2.12172	-0.15474		-0.65888	1.13839	0.00682	-1.52001	-0.25871	0.105093	1.9194	7.2997	0.203281	-0.183	-0.25081
76	3.65235	18.9691	11.3419	6.81355	1.97146	0.61789	9.47056	1.51532	4.29131	1.55273	-0.75248		-0.39797	-1.09493	0.133897	0.580768	1.90291	1.48608	0.353347	1.30931	0.448844	-0.63445	1.29939		7.77926	0.991074	27.9177	4.7513	4.76115	1.16785	26.1332	34.3813	1.8716	3.29168	-0.07934		-1.63892	0.580727	-0.82463	0.195396	0.359304	1.43561	2.21222	4.23617	-1.21331	-1.3967	0.868918
77	1.31657	19.2543	14.7987	6.60719	1.76504	0.139239	9.05711	1.49689	1.26622	1.28916	1.93147		-2.13428	-0.2021	-0.21681	0.127352	-0.74338	-0.77125	-0.57755	2.74519	-1.86643	0.107627	-0.86461		5.06275	0.399411	22.8569	7.94044	4.99711	1.90129	22.0733	28.4748	1.99921	2.61703	-0.82446		-2.08113	-0.83351	-1.99964	0.812223	-0.41508	-1.05508	1.58029	2.63659	-0.11562	-1.72278	0.229377
78	6.36234	17.5433	14.7014	6.71434	3.24389	1.54234	10.2384	3.15166	2.55558	3.1624	2.62433		0.858155	1.27241	-0.64406	-0.01344	1.43281	0.037485	-0.81924	2.20841	-0.68774	-1.62789	0.234013		5.51098	1.88444	17.1996	9.15669	4.7457	1.06659	23.7682	26.9424	2.29586	-0.06952	1.30501		0.068607	0.145744	-1.12214	-0.01043	0.384912	-1.27759	1.48861	0.179727	-0.19055	-1.69176	-0.04376
79	0.517927	15.8674	9.29034	6.06137	4.22855	0.412199	8.27042	3.30265	2.6087	3.92381	-0.02258		-1.76511	0.464515	-0.79796	1.58116	2.23864	4.41703	-1.25053	0.331731	0.54653	-0.13415	-1.442		3.18738	0.270361	15.0978	6.23188	4.00737	0.725184	21.4216	32.4414	3.19696	-0.84698	0.332473		0.460165	3.25744	-0.77907	-0.72078	1.38507	-0.03189	0.557601	0.130278	-0.12693	-2.76252	-0.98265
80	2.82116	13.4584	6.81254	5.99601	2.82556	-0.68546	6.83539	6.23512	3.05012	0.991567	0.442791		-0.06106	-0.95554	-0.56236	0.727401	2.3574	2.70833	-1.33815	0.129827	-0.99277	-0.16725	-0.73205		3.41635	2.3107	11.7493	5.8678	2.28671	0.69658	24.772	25.524	2.16607	-0.36028	-1.98861		-0.87622	0.343427	1.38378	-1.12109	0.353679	-2.26294	1.30737	0.754649	0.590152	-2.21611	-0.16519
81	3.21601	12.5332	10.2165	6.60237	2.00339	2.8408	3.70831	3.3928	3.04752	0.108438	0.420247		-1.24944	1.32245	-1.21152	0.879528	1.20153	2.24591	-1.52622	0.991601	-1.38671	-0.16815	-0.61702		3.52901	0.684773	21.621	4.91791	3.17699	-0.9003	25.8195	15.4556	4.26236	5.59525	1.00799		-0.19736	0.296208	-0.14242	-1.8872	0.576131	-0.33967	1.72321	0.9508	-0.87478	-0.69985	-0.17246
82	3.83399	11.3411	11.6143	4.35272	2.65124	1.8552	4.49441	3.94393	1.32543	1.54446	-0.12336		0.254389	-0.53199	0.184375	0.741941	-0.79832	1.3278	-0.73672	2.26281	-1.50634	-0.5473	-1.01522		4.024	1.21462	25.8431	6.79352	3.77003	-0.86557	25.2569	11.1965	3.27004	7.21958	-0.51103		0.593832	0.338229	0.001209	-2.21611	0.072016	-2.52254	1.25985	1.05069	-1.94569	0.268033	0.325259
83	2.00337	7.30921	8.1766	3.96171	2.91094	-0.19298	5.41894	3.00419	3.70087	2.12793	1.60898		-1.28068	1.46449	-0.16514	0.356858	-0.12821	3.68797	-0.70482	0.542948	-1.01056	-0.29571	-1.78572		1.65249	-0.72946	29.0127	3.13515	2.60922	0.350895	25.8958	8.91019	5.27134	11.6234	16.092		-1.07315	1.6305	0.2452	-2.21929	0.466136	-1.52004	1.58443	-0.34056	-1.64877	1.22262	3.9722
84	3.38406	8.6822	10.0407	4.65214	2.95221	0.584476	3.64475	1.73198	2.05393	1.07364	-0.66178		-1.95944	1.11172	-0.14612	0.75817	0.414014	2.00753	-1.18205	0.214723	-1.32504	-1.62248	-0.2706		3.51563	-1.28088	29.1166	4.01827	2.16617	0.593354	24.9027	9.08062	2.49293	8.35456	18.7448		-2.51705	0.433951	-0.9306	-2.70789	0.32053	0.386327	0.438675	-0.93069	-0.41363	-1.60954	4.55225
85	1.02906	6.34004	10.8135	3.99904	1.86437	1.55306	1.64014	3.41604	2.82084	-0.35043	-1.36152		-0.49965	3.19678	-0.309	0.907737	-1.27227	3.74219	0.030814	0.31654	-1.57321	-1.11712	-1.45024		1.93685	-1.02122	19.4062	3.93476	-0.09281	-0.6139	25.2953	6.17531	2.14825	6.25188	10.6364		0.40501	0.377386	-0.21407	-2.71511	-0.80461	-2.26108	0.274034	0.274478	-0.91021	-1.65509	2.25085
86	2.0326	9.30405	7.55452	2.96629	1.57785	1.72356	0.031536	1.98066	4.26231	-0.59235	1.04643		-0.30235	0.000266	-1.05384	0.571677	-0.61057	6.25023	-0.01241	1.09086	-2.65977	0.94235	-2.59687		3.7098	-0.86262	11.8503	3.13533	0.05282	2.15403	23.5579	27.298	3.17804	9.11185	3.98443		-3.91112	-1.39475	-0.16978	-0.08779	0.431321	-0.31302	0.41341	-0.88143	-1.02322	-1.6001	1.59539
87	0.27053	5.95356	4.12025	4.54296	2.76312	0.5115	-1.19882	3.33231	3.86539	0.916314	-0.38953		0.570619	2.33438	-0.10139	1.12024	-0.8897	4.58814	-0.37042	-0.08575	2.50425	-2.0109	-2.55145		2.78462	1.26092	26.8128	3.62994	0.742824	-0.08868	25.1113	32.8529	3.72431	11.9909	2.20713		0.356704	-0.36763	1.47563	0.216196	1.46056	0.342015	-0.30554	-0.34111	-0.93497	-1.47861	0.844005
88	-0.22952	7.83878	6.25506	5.81803	1.84619	0.087177	-1.35511	4.72449	4.56422	2.72298	-0.63829		1.61667	0.495011	-0.69606	2.33811	1.25955	1.53458	0.254956	1.03961	0.600964	-0.43489	-0.88106		3.78559	-1.53075	18.3867	4.75818	0.37395	1.38684	24.3269	35.8655	4.45164	9.6648	1.78155		-2.31409	-0.47264	-0.05957	0.198277	0.244489	-2.30797	-0.90401	9.26579	0.417748	-1.88898	0.999503
89	-0.04303	6.17356	8.41129	10.1314	3.23317	2.10718	0.017572	5.19477	2.80253	0.44288	0.73126		-1.88825	0.508579	-0.89124	1.27838	-0.54417	-0.84406	0.645655	0.703246	-0.99026	-0.41426	-1.17744		3.56183	-0.70937	13.3024	4.32746	0.495592	0.649293	22.6936	34.9794	1.816	10.344	1.39547		-0.44225	-0.55162	0.11386	-0.91221	0.08639	-0.59883	-0.92247	15.2173	1.66795	-0.52949	1.03735
90	0.932786	6.41543	3.85202	8.19738	1.51524	1.34803	-0.49302	3.51232	6.02344	1.54733	-0.43036		1.44417	0.250649	-0.97238	0.155223	-1.19248	-1.36403	1.24258	0.92388	-0.96869	1.55282	-0.67861		3.80202	0.208241	8.90085	4.60822	1.70408	1.8019	19.4852	35.509	4.32793	8.13501	1.65777		-2.24857	1.35019	1.30647	-1.54276	0.10935	-0.85475	0.837085	10.5469	-1.02511	-0.98832	-0.44545
91	0.989598	5.6078	3.38547	9.20352	2.87693	0.262618	-0.89187	5.07987	1.67257	2.07828	0.12808		-1.53625	0.683624	0.296932	0.775745	-0.24369	1.13526	0.966063	0.384328	0.0795	-0.51224	-0.72839		2.01737	1.05611	24.0767	2.65257	2.02623	2.20016	21.4532	34.2276	-0.16052	10.0538	1.60701		0.169854	-0.07438	-1.53607	-0.76707	-0.08257	1.26458	1.39837	11.651	0.185041	-1.62217	-0.47634
92	3.5301	5.00305	0.739863	6.29447	1.4879	-0.05345	0.621775	5.30295	5.73839	2.81129	-0.30897		0.759476	1.65942	-0.20978	1.67206	0.516646	-0.13883	-0.24052	-0.04635	-2.7851	1.11051	-2.25785		2.696	-0.73029	18.6172	2.63107	1.70883	0.765556	19.1124	33.6894	-0.07822	7.80855	2.73471		-3.24542	-0.95611	-0.72029	-0.83731	0.545092	-0.15731	0.839075	5.57496	0.091585	-0.98994	1.40897
93	2.26788	4.94913	1.64223	8.80021	1.48049	1.26409	-0.13472	4.77774	3.91426	2.27845	-0.64809		-2.00167	0.581412	0.015154	1.24792	-1.20843	1.12532	-0.30078	1.35248	-1.72049	-0.4202	-1.72639		3.47858	-0.70758	13.3976	3.17835	3.23721	1.53567	14.1811	31.7151	2.14793	9.20305	2.37229		-0.76175	-0.54417	-1.84624	-1.97387	-0.75748	-1.88146	1.35254	1.86923	-0.91499	-1.86232	1.19501
94	0.218914	3.84497	-0.20857	6.59584	3.20322	2.40564	0.059471	4.24217	4.95456	0.539047	-0.40376		-0.99825	-0.20015	-1.22575	1.15687	-0.58818	-0.70853	0.873322	-0.13216	-0.76989	-2.49327	-2.03497		1.40275	-0.9353	10.2581	2.55541	2.73246	-0.67233	8.97562	31.7174	4.03342	8.04576	-0.78275		-1.23721	1.95668	10.0525	-2.07468	0.12493	-2.79674	1.56398	-0.30494	0.109076	-0.75541	0.820979
95	4.00118	1.03213	1.28939	7.05278	0.970073	2.1452	-1.8696	2.69334	3.51743	1.36864	0.458683		-0.26458	-0.00604	-1.22939	-0.19954	2.04637	2.97465	0.514379	-0.62339	0.33269	0.181478	-1.80824		3.22125	-1.56606	5.98615	3.9113	0.513999	0.450069	18.0871	31.1728	3.30465	6.26626	-0.58339		-0.40851	-1.48624	3.69208	0.004546	-0.45554	0.17991	1.38499	0.110594	-1.1158	-1.01735	-1.06718
96	0.472167	4.70571	3.51946	6.92225	0.90128	0.705104	0.159972	2.64658	3.70838	1.51097	-1.37446		-1.36789	0.802589	0.953227	1.90073	-0.10072	3.99463	0.021107	-1.15773	1.0768	0.391308	0.019935		3.95448	1.61749	7.95807	3.21221	0.050543	0.018392	22.6381	28.6012	4.82783	4.34993	1.61167		-0.84096	1.44416	2.26282	0.482181	-0.65102	-0.56773	1.519	1.46518	0.042881	-1.93148	0.25253
97	3.00923	4.24473	7.98271	6.67361	1.74368	1.5183	-0.87701	3.80478	3.8974	2.51442	-1.17298		-0.22485	1.45175	0.194175	1.20133	-0.57485	3.62765	0.758404	0.097421	-2.20272	0.84665	-0.07868		0.195293	-0.50096	5.39975	4.36064	2.88771	0.966304	14.8245	27.3727	2.00415	3.65912	-1.45722		0.207453	-0.20522	2.61776	-0.70447	-0.41085	0.114846	1.15513	12.2611	0.400889	-0.55244	0.830139
98	1.3975	2.19243	4.1452	6.20402	1.35542	1.19366	5.00091	1.85702	3.35852	2.04463	1.96825		2.39036	0.975255	-0.34881	0.976131	-1.889	2.80965	0.148835	0.46037	1.09444	-2.14128	-0.36797		3.42979	0.853678	4.09025	2.46683	3.47532	2.01585	11.2212	25.2714	5.19784	1.94883	0.341547		-1.62636	0.479885	0.10399	-0.25046	-0.74559	-0.23603	1.01247	11.1104	-0.7872	-2.42971	0.348676
99	1.02337	0.58344	3.57659	7.19462	0.146271	1.53474	4.0499	1.23163	4.46086	1.72978	-1.05541		-0.14497	0.120748	-0.07866	0.283024	1.46448	1.11191	0.050401	0.703934	1.09909	0.240701	-1.14087		0.362741	-0.29978	2.53646	2.08393	1.11926	-0.09194	7.8876	22.919	2.1793	7.53408	1.28451		-1.38172	1.60862	-0.49871	-0.72185	0.094649	-2.58191	0.757598	5.98906	0.058952	-2.69762	0.159131
100	0.864449	2.78554	2.3766	7.9185	1.70952	-0.24761	3.14214	3.84089	2.85123	1.25696	-0.89779		-0.98938	-0.94417	0.245953	1.1344	-1.63885	0.552063	-0.00961	0.869892	0.562464	0.170565	-0.16957		1.20121	0.897415	-0.25764	1.66808	2.43986	2.24062	11.3526	19.6844	3.65309	9.27417	0.114381		-0.88913	0.445635	0.358564	-1.9618	-0.33796	0.461002	-0.14882	5.48558	-1.4672	-2.61472	-0.61243
101	3.08138	3.33615	6.47996	6.95893	2.52273	0.21267	1.71737	2.63659	4.72301	2.01233	-1.26883		-1.17382	-0.21858	0.211238	1.13245	-1.95943	0.729983	1.19159	-0.8568	0.503571	0.25469	0.571658		2.67132	-0.34036	3.39445	2.25725	0.795254	1.27158	15.4074	14.5651	5.08807	3.53597	-2.07274		-2.91953	-0.18057	0.530616	-2.27279	-1.78747	1.17154	0.046377	1.30741	-0.33557	-0.90255	-0.04175
102	-0.1387	2.58278	-0.18823	6.98545	0.82927	-0.24565	-0.20524	2.87731	2.98347	1.07112	-0.36571		0.805319	1.86525	0.79891	1.83798	-0.1048	2.30566	1.10797	0.256588	0.794359	1.36873	-0.28509		0.08957	-0.28376	2.6999	1.40157	-2.16296	-0.44803	20.497	10.6839	3.56794	4.83868	1.52597		-0.12471	-0.64557	-0.49214	1.19342	-0.93811	-2.81267	1.14544	-0.27545	-0.04069	-2.74006	-0.7605
103	0.989459	1.38959	0.287163	6.34087	3.87431	0.991171	-0.04351	2.43056	3.89618	1.23184	-0.54377		-1.89053	0.385047	0.129729	0.467619	-1.20704	3.33692	0.343176	0.385377	1.71471	2.06946	-1.63587		2.13656	-1.4488	3.07415	2.37012	1.86006	1.89475	20.353	6.90624	1.37804	2.97898	1.24135		-3.31632	-0.02988	0.998099	-0.65297	0.384945	-2.10845	0.704152	-0.48371	-1.85584	-1.9774	-0.74523
104	0.317419	2.77245	2.89423	8.96538	2.76624	0.666355	1.73784	1.30923	5.24219	1.29921	-0.02822		0.210936	0.141316	-0.05182	3.10753	0.25088	6.4263	-0.28711	-1.72645	0.280176	-0.63672	-2.00921		0.43933	0.424986	-0.32748	1.82022	0.725734	1.54987	16.3319	4.70645	1.86698	3.16646	-0.31627		-1.77001	0.753348	-1.3779	-1.92345	-0.84925	-1.08386	0.555478	0.002835	-0.58355	-1.69421	0.48839
105	-0.41454	1.96388	3.28321	6.57484	1.25194	1.26228	0.604915	0.716287	7.53807	2.06931	0.148814		-0.69484	0.85773	0.496447	2.12471	0.336028	4.18247	-0.51212	0.605537	-0.74301	1.84816	-1.59082		1.68774	-0.09975	0.751208	2.45981	0.573313	-0.35277	11.2346	6.35325	0.956327	3.20168	0.125426		-2.71168	0.020943	-0.9169	-1.8399	-1.77398	-0.77613	-0.14135	-1.03789	-0.69835	-1.37392	-0.24161
106	0.963212	1.05656	2.37214	5.27413	-0.4137	3.56487	2.2377	1.49081	4.11198	2.30143	-1.36269		-0.13354	-0.04	-0.09187	1.85914	-2.1877	2.2938	-1.03152	10.9165	3.68982	-2.05099	-1.2143		2.37526	-0.60396	2.03485	3.5498	0.307726	0.975669	9.87118	5.70589	2.74594	7.14525	-1.24718		-1.42694	-1.08872	-0.98462	-0.63786	0.052862	-2.17913	-1.12987	0.045031	0.284592	-0.91843	0.427492
107	0.058971	1.46637	5.81619	6.66415	1.21758	1.80569	0.675594	2.7743	3.28331	3.1278	0.673688		0.440828	0.170803	-0.9652	0.485389	-1.34591	7.39948	0.687433	7.70449	2.1465	-1.08288	0.558247		1.71258	0.506518	2.29051	5.55542	-0.66692	-0.21674	5.56976	3.95652	4.50544	4.6017	-0.97673		-2.30308	-0.32648	-1.88729	-2.31798	-1.0798	-1.74572	-0.24328	-0.27768	-2.58276	-0.60723	-0.32646
108	2.36816	1.81672	0.757118	4.52014	0.451096	1.85991	0.556694	1.80625	3.89508	1.29385	0.045946		-0.5731	2.20286	-1.333	0.258021	1.12143	5.35781	1.44026	15.6726	2.08542	-0.87966	0.248505		2.21493	-0.51136	4.6316	2.49193	1.17976	-0.64383	17.7219	2.39337	1.53092	3.24276	2.12699		-3.1176	1.14283	0.340102	-1.69849	-0.97489	-1.87192	1.24427	-0.37438	0.72699	-1.67011	-1.07602
109	-0.99455	2.3395	-0.37154	8.01731	0.236668	2.57682	0.008483	2.07093	5.47802	4.49892	1.78721		-0.76788	0.504614	-0.80928	0.44554	2.07875	5.52597	1.82451	9.6985	0.40275	-1.3351	-0.78406		1.13712	-0.41446	20.3378	2.0947	-1.77588	-0.79315	20.8937	4.70957	3.85558	6.45491	-0.02166		-3.27557	-0.41405	-0.6566	-0.28274	-0.75353	-4.09951	1.02464	0.675518	-1.55672	-1.67507	-1.15069
110	-0.59374	0.680621	1.27868	10.8277	0.540047	1.34316	0.308798	2.34924	4.24463	2.05606	17.2075		0.675838	1.53713	-0.02131	0.9793	-1.98294	4.50774	1.36824	5.58897	1.47517	0.308045	0.007702		3.46442	1.67605	13.3744	3.38724	0.060286	-0.81315	16.7297	2.95792	2.99212	3.60663	0.484339		-3.10503	-0.78212	-0.26335	0.889901	0.273879	-2.12047	0.144993	0.114198	-0.15378	-1.95124	-0.87714
111	1.30538	4.78939	1.04846	6.89808	0.245048	1.30101	-0.8856	2.69389	3.92462	0.822399	14.2913		0.529901	1.81333	-1.75178	0.59733	-1.71005	4.60004	2.07528	2.14497	1.07041	0.654153	0.433468		2.87651	0.491178	11.5302	7.8096	2.54882	2.86626	12.616	12.9171	3.33733	3.34929	-0.45807		-1.93378	1.23528	-0.58339	0.879987	0.060594	-1.98682	-0.58984	-0.91396	0.273539	-1.45619	-0.51894
112	-0.08431	2.90413	1.27199	7.02964	0.177196	0.85005	-0.12806	1.83973	3.41078	0.547012	9.16146		-1.42666	1.92495	-0.81659	1.96368	-0.60307	5.64899	1.69262	1.9056	0.040674	0.897019	1.33419		3.38528	-0.25495	9.28518	4.00796	1.49414	1.33712	6.86269	22.5237	4.76708	0.71942	-0.21961		-3.79447	1.25731	0.502731	-0.50162	-0.581	-2.16971	0.205534	1.65013	-0.40813	-1.48031	0.412568
113	0.955615	-0.10884	0.449888	7.00685	-0.54152	1.08414	-0.92714	0.709126	3.37363	1.40829	6.54062		1.08764	-0.30256	-0.43165	0.923982	-2.81598	4.51587	0.992758	-0.06305	1.31696	-0.18386	-0.05832		3.13962	-1.33435	7.43331	2.71664	1.81094	1.32045	8.0929	19.5039	6.08531	0.375761	0.025756		-3.33275	-1.45154	-1.42743	-1.49839	-0.11464	-4.51117	1.33402	-1.1248	0.19898	-2.87931	0.62118
114	0.647723	2.49591	1.2779	5.51635	-0.62842	2.83827	-1.61549	0.154792	3.2302	0.194298	6.07803		0.317302	-0.09028	-0.02413	1.68413	0.721135	2.37824	0.684917	0.618289	1.68324	-0.15633	-1.91998		2.65217	-2.02067	6.35857	6.02548	0.456704	2.68826	15.4248	11.5036	4.64805	1.38543	-2.88972		2.05901	1.6002	-2.05413	-1.61913	-0.16793	-2.06712	1.0254	-0.21199	0.128516	-0.79658	0.607109
115	1.32224	2.78624	0.099825	5.70509	1.41673	2.04947	-0.58225	1.47091	4.07901	1.32424	2.01929		-0.93399	0.954431	-0.13934	-0.07648	-0.61957	2.97999	0.332847	0.621816	1.70094	-0.60347	0.447647		2.10323	-0.62594	9.42022	5.33383	-1.83892	1.48005	14.0996	8.13125	5.06423	1.41677	0.772612		1.33862	-1.27512	-1.47564	-1.99369	-0.1121	-2.70126	1.52109	0.419529	-0.84755	-0.41567	0.465805
116	1.17473	3.31119	4.74205	5.07179	1.95078	-0.47729	0.281157	1.85947	3.52003	0.415525	3.63897		1.0541	1.0053	0.177051	0.256413	-1.32883	3.56518	-0.47943	0.651288	1.62134	-0.5128	-0.40383		1.98413	0.671017	13.9601	4.13842	-1.10401	0.550844	11.4235	4.3507	4.58759	1.40408	-0.48433		-1.77799	1.58482	1.25613	-1.4499	-0.6742	-2.40416	1.4422	-0.45421	-0.36497	-3.14639	-0.83056
117	1.54072	1.19957	3.45488	7.63849	0.441615	-0.65837	-1.30737	0.249691	4.47285	2.91742	2.73899		-0.57032	1.11981	0.311316	1.10522	0.657088	3.5462	-0.69479	0.675871	2.4331	-0.49696	-1.45684		2.73263	-0.85183	12.646	2.64107	-1.39141	1.29903	8.297	5.36382	6.01814	2.72238	-0.196		-3.021	2.02845	0.179953	-2.06786	-0.24077	-2.06748	1.37794	-1.13699	0.214512	-2.46256	-0.11597
118	0.437434	1.98361	6.19024	6.3033	-1.50606	4.231	-0.64398	2.795	4.8455	2.00174	0.458023		-1.18176	3.16342	-0.70346	1.35242	-0.49149	4.51056	-0.9487	0.070874	0.957675	-1.3843	-0.61255		4.30821	0.761174	8.32081	0.972169	0.377567	0.373219	10.4902	3.26979	3.84521	2.86675	-0.87493		-1.68792	1.4116	-0.4641	-1.5747	-0.38574	0.168721	0.433574	-1.13262	0.898235	-0.3651	0.656326
119	0.375527	4.29267	3.17293	5.61365	1.35453	-0.63734	-1.22586	9.59117	5.68498	3.86956	1.32517		-0.00496	1.14853	-0.44497	1.89918	1.31258	8.9066	-0.92616	-0.44376	0.755008	-2.12775	-0.96528		-0.5028	-1.11817	4.21647	0.234149	-0.11802	1.68198	15.183	2.69967	3.78471	1.78775	-0.17956		-2.97749	2.424	-1.46552	-1.87831	-1.19501	-0.85498	-0.26743	-0.4321	1.58823	-1.18373	0.497186
120	1.43739	3.45285	3.90202	6.04648	0.186415	0.073476	-0.45594	4.79162	6.47828	0.453399	-0.39571		-0.37121	2.52228	0.533273	1.43907	-2.42228	0.947336	-1.06389	0.324076	0.478834	1.29889	-0.71239		3.39689	-0.49223	3.36278	0.344917	-1.1928	0.259087	12.1197	2.19726	3.26247	-0.12687	0.072403		-1.5263	3.19116	-0.75513	-1.13769	0.242722	-2.24451	0.647534	-1.39363	-1.49688	-2.53051	0.198112
121	1.05957	2.05738	7.84233	5.22729	0.84131	0.159132	0.206798	4.3713	7.56658	2.15117	-0.94833		-0.05142	1.45322	-0.66241	0.980012	-2.47095	1.86351	-1.29937	-0.10601	-0.65889	-0.6782	-0.41256		0.160169	-0.12545	17.653	-0.56016	-0.46589	0.940543	6.58395	0.360961	3.6144	1.56156	0.03778		0.066994	1.25239	-0.97834	0.592227	-0.74657	-3.39066	1.05208	-1.05019	0.496978	-1.97067	-0.19452
122	0.352937	1.72672	7.58583	7.44502	1.20954	-0.3274	4.96408	3.6993	7.26729	3.44319	0.42699		-1.05602	0.382108	0.343291	0.542736	0.212929	3.3488	-0.64521	0.738442	0.264613	0.183404	-0.77163		2.64297	-0.3843	11.4	-0.66999	-0.11436	0.755875	3.95652	1.58808	6.54112	-0.07991	1.35357		-0.43223	4.09703	-1.39	-0.26284	-0.0341	-2.51812	1.07018	-0.10343	0.855836	-1.61451	-0.84422
123	1.68289	3.12298	9.19221	12.3949	-1.25623	-0.45051	6.81828	2.85451	4.35712	3.23862	1.76752		-0.37619	1.33547	-0.04014	0.815136	1.11659	5.54652	-1.14664	-0.10743	0.71343	0.589686	0.285339		-0.4255	0.700465	7.70455	1.35444	-0.25293	1.14559	4.08876	20.8816	1.74512	0.696977	1.63326		-2.39089	4.57198	-0.98671	0.398174	1.1265	-1.19899	1.07533	-0.73313	0.531498	1.0092	-1.12175
124	-0.63515	3.16036	3.2108	9.93719	-0.33722	0.32315	9.04485	2.61998	6.16517	2.08072	-0.3557		-1.06389	1.99531	0.404669	1.89245	2.19439	5.09853	-0.98499	1.32581	2.43374	-0.28448	-2.00585		1.0494	-1.2177	7.31969	1.34954	-1.39944	1.08422	2.93783	16.8824	1.95783	0.862382	0.340447		-3.47045	2.88386	-0.26806	-0.24675	0.065249	-4.03389	1.68644	-0.85657	0.292186	0.77217	-0.25758
125	0.264373	1.46336	7.32576	6.99499	-2.05809	-2.98966	9.18238	2.82855	3.11912	3.58209	0.356718		-1.09034	0.388614	-0.74267	1.2556	0.702876	4.82956	-1.2614	-0.53093	2.2387	0.821365	-0.52901		2.19623	-1.06003	2.42161	1.73063	-2.4433	-0.88446	3.14881	13.2344	4.55011	1.4611	1.21595		-2.08584	2.34572	-1.52171	1.83245	-0.59224	-3.32805	0.923088	0.577587	-0.97549	-1.88192	-0.21548
126	2.43638	0.069291	3.35645	7.95229	2.13705	2.49212	9.83934	2.49978	6.93991	2.47989	-1.7048		-0.89549	0.718982	-0.82664	0.778749	-0.12165	4.4317	-1.1208	1.50967	1.51165	-0.66494	-0.9333		3.22247	-1.79554	4.73107	2.85619	-0.73297	2.36632	3.08679	8.3049	4.02664	-1.31457	2.05679		-3.31481	1.31877	-1.22131	4.03831	-1.19357	-0.8993	0.667295	1.69308	0.146457	-0.83969	0.298867
127	-0.65903	1.25084	0.210527	9.52874	-0.53557	1.65465	7.75685	2.12808	2.83171	2.02656	-1.59694		-0.08774	1.5229	-0.42082	-0.34112	-0.73977	5.49402	-1.32033	-0.92134	0.50542	-2.00386	-0.01989		1.94487	-0.6722	3.13483	1.16891	-0.73321	0.34948	3.1242	6.32561	2.36693	-0.55842	1.80025		-1.46215	3.83122	-1.3756	0.774672	-0.71502	-1.11984	1.43897	-1.18552	-1.63991	-1.57448	-1.08441
128	-1.96686	0.255925	2.19991	9.73784	-0.43623	0.85306	8.27884	2.82781	5.39163	2.67501	1.73924		0.181053	1.26832	-0.69754	-0.34192	-0.4593	4.46407	-1.38458	1.06133	1.29502	1.26094	-0.04633		1.95201	-1.0016	-0.35485	2.41516	-1.47175	0.755853	3.30039	5.38372	3.12206	0.245907	-2.20516		-0.09538	-0.11515	-2.08194	-0.35367	-0.94143	-1.3447	1.60645	-1.20811	-0.59309	-2.38464	-0.38353
129	0.352001	1.53489	1.81031	8.88397	-0.31874	0.505327	6.92098	1.46406	3.81677	1.69002	-0.744		-1.66664	1.25893	-0.04852	-1.06626	0.009263	6.40742	-1.50805	-0.67134	1.00792	-1.57417	-1.28477		0.26081	-0.15444	1.87189	-0.12245	0.251051	-1.0253	2.88875	3.70613	6.96865	-0.23848	0.086513		-0.1768	0.758959	-0.48268	0.475311	-1.0458	-1.28121	1.11147	11.189	2.36356	-1.45487	-0.24563
130	1.45442	1.59452	1.10919	8.93045	1.38618	1.19417	4.28809	0.074768	2.56311	1.33937	-0.34987		-1.61765	2.61034	0.146463	-1.53851	-1.20433	5.42852	-1.61993	-0.16394	0.645326	-0.79424	-1.64287		-0.25105	1.32346	2.22036	2.2841	-1.02367	1.45662	13.5297	5.30215	4.47352	3.12225	0.517572		-0.82109	-1.64146	-0.64746	1.17766	1.41934	-5.22153	-0.01388	13.3823	0.417913	-0.14034	-0.8011
131	1.53073	1.42222	0.976693	6.92705	0.038341	-0.21237	2.47038	1.22397	3.87802	3.42401	-2.35729		-0.52639	2.92364	0.06629	-0.95754	1.06623	3.38443	-1.60587	0.247133	0.068155	-2.33807	-0.39638		2.86029	-0.65741	0.814415	8.73125	-1.23444	-0.54612	11.0579	4.08331	3.8189	3.48183	0.428418		-3.23421	-0.20414	-0.10815	1.32949	0.424554	-0.41997	1.11745	7.05245	0.538647	-1.12816	-0.49099
132	1.11559	2.19575	2.44353	9.86138	0.602851	-1.19218	0.72303	1.10976	6.09225	2.22401	-0.31354		-0.42979	1.17178	-1.08991	-0.71197	1.51669	2.73934	-1.4238	-0.20968	1.84946	-1.40718	-0.36259		2.37394	-0.46028	2.43406	4.12758	-0.31289	2.05591	6.71869	3.16371	4.36993	3.0645	0.518217		-3.09064	-0.3685	-0.6252	0.213397	-1.30202	-1.15846	1.55397	4.84805	0.773682	-2.72454	-0.77829
133	0.406698	0.641021	4.99837	8.87398	-0.96293	0.629776	0.545122	1.19607	6.0579	5.5219	-0.81805		1.02366	1.21361	-1.19346	-1.35085	-2.11611	2.71177	-1.38669	-0.48659	0.992065	-2.0019	-1.26039		1.57627	0.099624	-2.09845	1.77219	-1.04914	1.0507	5.92848	4.01233	6.59952	2.54668	-1.69482		0.747142	1.98536	-0.56926	-0.6752	-0.39485	-2.32444	1.05344	3.38284	0.050125	-2.4272	0.363679
134	1.70483	1.92007	5.73025	9.52822	-1.31316	1.3435	0.804592	0.68962	3.44097	2.43047	1.08735		-0.77823	-0.06796	0.529645	-1.36891	0.038	4.6958	-0.61005	0.35228	0.550917	0.578352	-1.74479		-0.38442	-0.15005	3.7332	-0.14849	-0.5806	1.21065	4.58409	1.92952	2.29905	5.09591	-0.47702		-3.93218	-0.016	-0.32987	-1.80614	-0.2637	-2.21056	0.652289	2.32609	-0.55301	-2.6262	-0.50885
135	1.35641	1.40283	3.30937	11.904	-1.51488	1.5083	0.004937	0.225375	6.72323	1.70018	-0.00639		-2.05173	2.3502	0.168202	0.172711	0.136943	2.66571	0.71063	-0.52405	-0.90966	-1.67599	-0.47417		1.5623	0.615213	-0.43599	1.56498	-1.8186	2.08674	4.37136	2.74977	3.36855	7.03039	1.00494		-2.41717	2.23485	-2.17462	-1.06215	-0.87001	-1.46692	-0.18444	0.269694	-0.1978	-4.85554	-0.83614
136	0.71463	1.53296	1.24209	11.2296	0.452523	-1.5164	-0.31757	0.388151	5.62099	2.19833	-0.69306		-1.7614	3.1018	0.047053	-0.43377	0.105048	2.8952	1.78348	0.28989	-0.75361	0.179976	-0.29012		1.9791	-0.72648	3.7146	4.83012	0.050723	-1.13064	12.4423	0.879992	3.81021	8.42014	0.14029		-1.66354	0.662621	-2.21707	-1.41857	-0.22363	-2.19585	-0.68563	-0.60398	-0.38905	-2.95168	-0.64508
137	1.70286	2.67127	4.68208	9.06633	-0.51275	-1.85277	0.046047	3.86548	5.57991	2.50977	0.641865		1.09951	1.13654	0.249383	-0.37725	-0.39683	3.48282	1.48415	0.679518	0.883278	-0.6181	-1.38678		0.353973	-0.65056	2.93474	1.99707	-2.38027	2.05768	19.9432	3.01357	2.94477	7.78796	-0.71982		-1.91464	0.556122	-0.16033	-1.5474	-1.32157	-4.16042	-0.94766	-1.28213	1.45356	-2.69641	-0.15569
138	0.68972	2.64041	2.02191	9.74977	-0.50535	0.398761	0.491538	2.50758	4.52511	2.17958	-1.94174		-2.18125	1.87569	-0.16098	-0.79816	-0.12543	2.60658	0.695953	0.835614	0.034985	-0.11518	-1.95203		2.68335	1.29883	5.26237	0.603725	-2.03329	0.672274	19.5847	0.845284	5.49487	4.65365	-0.50836		-2.57913	0.375854	0.87505	0.8703	-1.37842	-3.32289	-1.64808	-0.22468	1.08863	-1.96935	-1.79376
139	-2.23741	0.954389	1.3822	11.1941	-1.06085	-1.04622	-0.97067	2.36997	5.13718	4.14797	-0.57941		-0.68202	0.295649	-0.72062	-0.37558	1.94178	1.96295	0.469845	0.8808	0.82761	-1.09057	-1.81831		1.26123	-1.69763	4.31455	-0.1187	-1.04204	1.26602	20.617	1.47616	4.81636	4.35181	0.394942		-0.01423	1.50114	0.383258	1.18559	-0.72392	-3.75926	-1.5529	-1.07756	-1.31632	-1.33945	4.98877
140	-0.97133	1.69085	5.84294	11.1389	-0.00675	1.52401	-0.39018	1.74253	6.37586	2.03432	-0.97841		0.142706	2.76503	-0.52319	-0.93088	2.67699	5.24958	-0.21508	0.589514	-0.70868	1.24125	-0.06028		-0.26951	-1.06749	2.47444	1.09096	-3.29614	1.30692	20.1074	1.67301	3.43589	6.01073	-2.52882		-1.84685	1.5526	-1.27918	1.38841	-0.64956	-2.19842	-1.92103	-1.35784	-0.52649	-1.3979	3.35143
141	3.69795	0.935093	2.4373	10.9643	1.74944	1.93066	-0.35251	1.05041	6.1255	0.462807	2.07438		0.222048	1.31335	-0.69802	-1.01601	0.535956	4.28535	-0.38111	0.227296	-1.08652	-0.8935	-0.88915		0.336376	-0.70041	1.58819	-0.97962	1.03734	-0.4116	15.0637	3.63937	3.85189	7.11769	0.694118		-2.71947	4.23651	-0.7553	-0.3991	-0.17832	0.100875	-1.95676	-0.69057	-0.88818	-2.68268	0.595423
142	0.037248	1.52662	5.37613	14.7335	-0.36495	1.67678	-1.14679	1.62401	5.55008	3.64577	-0.02312		-1.77074	0.340748	-0.72603	-1.05679	1.4619	2.49982	-0.22244	0.884438	0.630285	-0.5017	-1.08459		-0.12449	-1.07177	0.534596	0.608101	-3.07766	-1.1184	12.225	3.91813	5.81512	2.45158	-0.56682		-2.08304	-0.2121	-0.23809	-0.96353	-0.71059	-2.93413	0.115644	-0.57303	-0.34371	-1.98158	0.447448
143	0.040479	3.70219	1.59125	14.4654	0.676152	0.397972	-0.44585	1.38752	4.03862	2.7653	-1.21285		-1.80382	2.16552	-0.42307	-1.339	0.496332	3.52513	1.89734	0.642113	0.471151	-0.63272	-0.52061		0.734582	-0.31396	-1.04804	1.17626	-0.74895	-1.24493	18.8788	22.2536	0.572781	5.07626	-1.1011		-3.05865	0.53682	-1.19737	-1.5007	0.238703	-1.61333	0.67644	-1.71869	-0.10613	-2.37603	-0.75273
144	1.09038	1.42864	3.90241	14.6865	0.474155	-0.19886	-1.05083	0.154199	5.23848	2.28683	0.394584		1.88063	0.665108	1.0856	-1.22946	-1.75614	3.76851	1.53148	-0.21088	0.68488	-0.99749	-0.62879		0.65723	-0.72642	2.31696	-1.66251	-0.52712	0.036334	22.1153	17.1793	2.89589	3.40289	4.88762		-3.45475	1.6169	-1.23398	-2.32409	0.151307	-2.72026	0.696203	-1.0905	-0.35673	-2.2119	-0.92445
145	-1.90354	2.08128	5.3366	11.5831	-0.24325	-0.94798	0.530248	1.3618	6.89809	3.20332	-0.8371		-0.42347	0.770198	-0.48372	-1.08616	0.329351	4.78267	1.07051	0.209972	1.95742	0.913565	-1.1225		0.611099	-0.29247	2.60442	0.205124	-1.61565	1.28561	18.7989	11.6028	4.80016	5.06949	12.8661		-3.14655	0.80406	0.525294	-1.78836	-0.29175	-1.60683	1.42014	-0.78705	-0.33599	-2.83182	-1.05827
146	-0.77812	0.143052	3.34335	10.0003	-1.58883	-1.11707	0.526208	2.55203	5.98637	2.86292	-1.9569		-0.37346	0.599216	0.662641	-0.28385	-1.1094	7.63644	0.713615	0.185325	1.13606	0.054705	-1.28081		2.75912	0.981439	3.90951	-0.34841	-3.01801	0.979783	15.3739	5.88805	3.41988	8.3562	7.78463		-4.09469	-0.49258	-0.03553	-1.52891	-1.57561	-2.07461	1.04297	-3.06748	0.535917	-1.34684	-0.16381
147	1.91647	0.65175	3.76205	10.3408	0.240366	0.502918	-1.61373	4.66728	6.23393	3.98466	1.39432		-1.8899	2.14754	-0.01244	0.795782	-2.81454	3.40002	0.629259	0.176101	2.37161	-0.36966	-0.76657		1.91026	-0.02202	3.19759	1.88488	-1.16665	0.643017	14.5169	5.57688	3.1056	8.0175	5.01499		-0.72594	1.01472	-1.09191	-1.28498	-0.41942	-2.66542	0.42265	-2.30765	1.47586	-3.19036	0.027436
148	-0.58332	1.44449	1.46908	9.50191	1.07126	-0.49006	-0.50219	2.53234	8.74151	4.33643	-0.72169		1.5814	1.29711	0.680049	0.700285	-1.82154	5.96189	0.132918	-0.36749	-1.05338	-0.80874	0.06851		-0.45188	-1.18953	2.5674	1.03865	-0.803	1.50027	12.5007	2.95836	3.55196	5.01679	1.65735		-0.92536	-0.19228	-2.25771	0.089353	-0.29808	-2.82982	0.443519	-1.37785	-0.37921	-0.85517	-0.16102
149	-0.13972	2.35668	1.86292	14.5033	-0.32312	-1.16153	-0.81941	-0.01836	6.11784	4.00317	-0.13396		1.09799	-0.16068	0.61515	0.551141	-1.04849	4.08546	-0.34767	0.847037	-0.96959	0.972656	0.692043		1.38054	-0.17863	2.09019	-0.45928	0.568058	2.75677	8.78605	2.04194	4.78127	3.64519	0.193705		-1.79019	-0.93819	0.039081	-0.43529	-0.22378	-3.51734	0.416039	-1.48639	0.641626	-1.8379	1.03142
150	-0.74526	1.61493	3.6739	19.3564	0.85598	0.761355	-0.02581	1.76125	7.46	4.32138	0.637175		-0.18558	1.99848	-1.40622	-0.13078	1.02544	4.0575	-1.05407	0.660816	0.795751	0.194564	-2.2055		0.976806	0.024907	1.20747	-0.41508	-0.6429	0.242435	5.797	3.88951	4.56497	2.429	0.675133		-3.71951	1.26921	-1.20943	-1.40859	-1.06458	-3.76963	-0.27001	0.255942	-1.04404	-2.23053	-0.70475
151	-3.1174	1.94204	0.295198	18.9978	0.507908	1.49639	-0.12391	1.77435	7.69826	4.30345	-1.13227		0.636939	2.84366	-0.48574	-0.68402	1.74311	3.53151	-0.79941	-0.02832	2.8803	-1.36608	-1.61857		0.73915	0.312024	-1.84864	2.35548	-0.34079	0.33596	5.56662	3.18134	4.76482	1.6026	4.02983		-3.74002	1.68999	-0.067	-1.58096	0.211575	-1.0439	-1.06198	-0.93441	0.970247	-0.23628	-0.84856
152	2.10636	1.6512	-0.49106	13.4584	-0.92098	0.010836	-1.31859	2.85158	7.61742	3.51345	0.172284		2.85352	1.57283	0.845351	-0.86018	-1.99138	2.85628	-1.27545	0.344317	1.11422	-0.4609	-0.04385		0.686813	-0.55678	4.05471	4.08251	0.19739	-0.10268	3.56706	0.441695	6.08009	2.94525	-0.38846		0.488876	1.17722	-1.69435	-1.50922	0.437098	-3.47016	-1.36557	-0.78576	0.573605	-2.01585	-0.35937
153	0.185385	0.276442	2.87011	11.0288	-0.28786	1.1075	-0.89211	0.259437	6.97118	1.6465	-0.85538		0.347678	0.692041	-0.18125	-1.10458	1.32823	4.28237	-1.53084	0.257233	0.866933	-0.60801	-0.24351		0.835883	-0.10889	1.79602	2.09923	-1.09823	0.157354	3.2877	2.39485	3.3166	1.3521	-0.51961		-0.99499	-0.1297	-0.49909	-1.39887	-0.57856	-1.18223	-1.6795	-1.08389	-0.69497	-1.19398	-0.2286
154	0.687537	1.01417	-1.59781	16.0338	-0.52504	0.916395	-0.85527	2.62699	6.51275	2.5216	-0.197		-0.88402	1.69137	-0.27975	-1.05482	0.374211	6.20967	-1.35942	-0.54095	1.35958	-0.30223	-2.94102		2.40617	-0.13512	0.792013	3.81006	-0.03878	-0.76843	3.0228	2.42503	8.36042	-0.17057	1.55122		-3.12141	0.899962	-1.30057	0.255512	-0.0868	-3.27707	-1.84739	-2.38141	0.093617	-1.641	0.811929
155	-0.5882	1.48012	4.16903	15.5051	-0.41571	1.78775	-0.62962	4.72574	7.55707	2.45738	0.431909		-0.59217	0.738761	-0.11503	-1.22685	1.83169	4.4289	-1.44799	-0.65428	0.308118	-0.90997	-1.45079		0.676072	-0.72176	1.92858	2.83647	0.566606	0.668341	2.14901	0.543595	5.18012	0.568799	-1.17418		2.00646	-0.30312	-0.4937	0.155064	0.991084	0.097548	-1.94801	-0.59737	-0.47432	-0.79139	-0.95991
156	-1.62654	0.995349	14.6387	15.0972	0.743918	-0.673	0.876306	6.26536	5.1163	2.61477	-0.17612		-0.99052	0.350726	-0.45584	-1.25058	-1.31702	3.84086	-0.42341	0.037711	1.80488	-2.10295	-1.26021		0.160063	0.180075	3.50999	2.1967	-2.66329	-0.0433	0.979959	1.91178	7.1343	1.09852	3.61863		-2.71092	0.696724	-1.88346	-0.55388	-0.29736	0.16406	-1.73218	-2.06599	-0.84761	-2.659	-0.61026
157	-0.19347	0.87787	7.72233	14.4982	0.616359	1.08668	3.43735	7.71396	6.36836	4.61911	0.332942		0.780693	0.920782	0.09812	-1.28342	0.769543	4.87503	-0.81483	-0.35732	0.096698	-0.24888	1.10413		0.806615	0.521058	0.669821	3.29229	-0.83451	0.990951	0.802951	0.27814	6.04246	1.30084	8.66224		-0.10509	-0.42222	-1.52458	-0.74141	-0.66766	-1.75161	-2.16518	-2.60877	-0.79867	-1.23382	-0.96959
158	0.459987	3.50723	6.30935	15.7062	-0.17795	-0.29389	10.9998	6.61466	6.74176	2.54867	0.277813		1.84075	2.62447	0.899295	-0.73749	-0.40006	6.64424	-0.89513	-0.69635	-0.78407	-0.819	-1.81812		0.4725	-0.50554	1.01391	0.901373	-0.56046	-0.60801	1.08947	2.25645	3.14727	0.57967	4.83861		1.0951	0.071688	-0.49219	-1.89526	-0.42254	-3.21684	-2.0389	-1.16109	0.123002	-1.81807	0.094274
159	-4.18216	1.62844	8.44728	16.6589	0.797638	0.573284	9.95347	4.58817	8.10421	3.54329	2.54827		-1.05835	-0.20846	-0.15392	-0.17324	1.2126	3.53402	-1.48154	0.093175	0.35717	-1.23631	-1.57967		2.86947	-0.82054	0.801544	1.87421	-2.26087	0.705576	6.97646	3.32308	4.97931	0.636197	3.33549		-1.37719	-1.41161	-1.32575	-2.38842	-0.44236	-2.98426	-2.1507	-0.70965	-0.6033	-1.70489	-0.571
160	3.09658	1.46662	5.8369	15.5822	-3.85953	1.85856	8.81934	4.79558	8.59989	5.76386	0.59994		-1.358	0.246796	-0.29251	-0.55529	1.29267	4.83943	-1.41695	1.81802	1.98466	-0.11501	0.531994		1.54265	1.51507	-0.49008	4.01361	-1.52372	0.115738	11.651	-0.66082	4.99328	1.48169	1.91838		-1.38535	0.091427	-0.11582	-1.87257	-0.38385	-2.0091	-2.12899	-0.06688	0.669398	-2.59023	-0.05504
161	-2.81714	3.09549	14.1791	14.2798	0.253527	2.38031	6.29644	4.83464	8.3083	3.79666	2.03389		1.15783	1.02103	-0.43636	0.140886	-1.13178	3.61449	-1.50685	0.825726	1.60281	0.24854	-1.20909		0.189887	-1.091	2.40195	1.70003	0.467373	0.249473	4.5191	0.68085	2.46128	-1.9428	1.23301		-1.92012	-0.2712	-0.41217	0.77732	0.016769	-1.82182	-2.068	-1.34673	0.018166	-3.28986	-0.50502
162	1.8032	1.65898	13.9025	13.307	-1.42334	-0.08282	4.19594	6.85245	7.76397	2.91486	-2.22657		0.380575	0.199053	-0.2974	-0.60643	0.524985	4.52721	-1.21331	1.09235	-2.22854	-1.85381	-0.51184		3.06075	-0.24305	1.81851	0.278258	-0.98509	-1.21559	3.03817	0.340609	5.70007	1.40182	-0.14703		-2.49547	-0.41103	-1.02409	4.27948	-0.64519	-3.82397	-2.06743	-0.5752	0.586039	-2.72223	0.130859
163	0.320526	1.31639	8.99173	14.7574	-0.98571	-0.7744	2.70304	7.18225	7.71763	3.9863	-1.25264		0.011848	0.387681	-0.02925	-0.99543	0.42433	4.73373	-1.1855	1.28898	2.56681	-0.07653	-1.05137		-1.10947	0.008321	0.325831	0.433986	-0.10028	-1.27182	2.37568	0.986584	4.74865	0.890496	2.29107		-0.66275	0.907521	-1.84437	2.53247	0.710868	-3.43597	-2.27818	-2.07958	0.836922	-2.55209	0.053933
164	-2.08237	2.71111	8.37246	12.3142	-1.53194	1.76177	1.06524	5.37506	6.68994	1.55457	-0.43027		1.39471	1.7023	-1.53614	-0.63246	-0.44536	5.44195	-1.43468	-0.49262	0.34057	-0.24566	-0.12131		0.61759	-0.76862	4.16885	0.688453	-0.27135	-0.57147	1.72806	0.053122	4.01734	0.02488	2.07844		-0.6143	-1.16411	-0.41834	0.549992	-0.02263	0.447937	-2.15529	-0.38382	0.673383	-2.77143	-0.33653
165	-0.80181	2.47884	8.00454	13.1536	-2.0521	-0.02796	-0.08275	5.49646	6.67911	2.84792	1.89347		2.02807	1.97518	-0.54852	-0.52852	-1.32053	6.06245	-1.30202	-0.3006	0.657373	-1.7273	-0.1959		0.349079	0.288344	6.02895	1.38365	-0.37121	-1.47641	2.56049	1.46823	6.46198	1.93587	1.74708		-1.94508	-0.3707	-2.091	-0.63097	-0.60716	-1.55832	-2.12483	-0.82212	-0.50474	-2.30448	1.848
166	-1.74359	1.57155	7.52431	13.1017	-1.35039	0.362101	-0.43703	4.15111	8.7909	1.89931	0.625433		-1.17116	1.4539	-0.27949	0.071945	1.3944	3.4901	-1.3673	-0.27586	0.946404	-0.2614	-0.1463		1.02133	-0.72739	0.693899	-0.59663	-1.77375	-0.01376	11.4504	1.50388	3.66428	1.00969	-1.06303		-0.797	-0.70495	-0.69442	-1.22481	-0.27857	-3.83356	-2.1813	-1.34974	0.017598	0.917648	0.899875
167	-1.17712	0.84505	12.0706	15.749	-1.42621	2.0626	0.944771	6.09619	6.73914	2.20332	0.477818		-0.10184	1.16491	-0.75519	0.516533	-0.29198	1.78364	-1.6507	-0.32989	1.14958	-0.13885	-1.44059		1.89403	-0.1792	2.26447	-0.94114	-0.38599	0.72816	19.8514	1.59313	3.64144	0.686791	0.241582		-3.72969	-0.97323	-2.05415	-2.01557	-0.83771	-1.54093	-1.92379	-2.35192	-0.47739	-1.6676	2.3685
168	0.601848	0.380945	10.8314	16.365	-0.48424	0.856683	0.552913	4.1171	8.45264	2.62405	-0.4319		-0.05066	-0.83352	0.350098	0.026368	0.573209	1.6369	0.945306	-0.10282	1.24422	-1.75658	0.0282		-1.35323	-0.91741	0.484727	-1.68048	-1.16994	-0.31107	19.8736	0.534483	4.93771	0.808012	-0.14362		-1.66966	-1.16042	-0.23747	-2.63784	-0.43992	-2.65101	-2.17488	-1.04772	-1.80673	-1.10268	0.588316
169	-1.22936	0.865434	6.82381	13.18	-1.56544	2.48076	-1.50379	5.16168	7.455	2.68301	0.136409		-0.57438	1.47806	0.413601	0.003384	0.297738	1.54357	0.758895	0.026265	-0.25072	-1.80534	-1.17672		-0.14769	-1.41439	0.329758	-1.79939	-1.2854	1.00611	20.7678	0.427613	5.333	0.04822	-0.19404		-0.43049	0.043836	-0.69601	-1.1047	0.399186	-0.36172	-2.20849	-1.24022	-1.94152	-1.26808	-0.56762
170	-0.77822	0.566214	5.57553	15.3766	-2.05006	1.60802	0.225818	5.90219	7.50645	1.15156	-0.14526		-1.31359	-0.09665	-0.61602	-0.73845	-1.69831	1.83287	1.46765	0.165578	2.33375	0.738146	-1.23278		0.67499	-0.88042	-1.287	-0.40164	-2.67514	-0.63405	13.5968	1.33057	5.27156	-0.65028	-0.46111		-1.95694	-2.31085	0.052835	-1.64352	-0.57813	-2.0306	-2.0683	-1.59301	-1.32456	0.336496	0.309049
171	1.20542	1.89817	5.2394	18.5696	-2.2695	0.565425	-0.44392	3.36674	6.65295	1.71983	0.873637		-0.69623	1.56806	0.157058	-0.69674	-3.15104	2.50398	1.15816	0.815146	0.224165	-1.06799	-2.12665		-0.03418	-1.67948	1.04069	2.92976	1.14099	0.595087	13.1275	0.300265	5.36145	0.168403	0.219143		-0.34491	-1.412	0.418982	-2.62345	-0.38428	-2.28851	-2.16783	-0.11651	-2.68551	-1.74366	1.28538
172	0.375963	0.747027	4.82545	15.1929	-0.85942	-0.58484	-0.24887	1.54879	6.53672	1.18739	-1.95243		1.9137	0.901729	-0.72564	-0.84514	-3.26436	5.15312	0.745096	0.447791	0.907168	0.241744	-1.50356		1.10429	0.813497	0.650976	2.25425	-0.69032	0.734868	7.60418	0.479078	5.88396	-1.14388	-0.32997		-3.88161	0.456089	-1.54465	-0.07757	-0.20259	-3.098	-1.83201	-1.42086	-1.3846	-1.21564	-0.12784
173	-1.26658	0.272328	6.52099	15.1338	-1.19197	1.89485	0.205196	3.65121	9.04593	3.4771	0.157663		-0.29014	1.07142	0.184535	-1.73309	0.987311	4.06702	1.02996	0.942885	3.16383	-0.21022	-0.61925		0.943146	-2.03187	1.5588	-0.36544	-1.26388	0.934062	6.85175	0.958906	2.81929	0.43805	0.495631		-2.97102	-0.55253	-1.52239	0.43508	-0.77432	-2.69199	1.23863	-2.52356	-1.38114	-2.31642	-0.46058
174	-2.38355	1.3765	9.12045	13.7464	-1.71789	1.01161	-1.16819	3.70365	9.42116	4.07528	-0.35302		2.30248	0.093422	-0.05891	-1.38192	-1.94229	3.30045	0.882131	1.4064	-0.82283	-3.06244	-1.32336		0.792868	-0.30759	1.11238	0.05268	-1.16171	-0.64093	4.15157	-0.48396	5.69526	1.15372	0.337362		-2.14178	0.891543	-0.67117	0.644609	-0.43988	-3.45007	1.32926	-1.71908	-1.23039	0.20796	0.655417
175	-1.57543	1.44496	7.16194	14.945	-1.98435	-0.4848	0.633384	3.78256	7.73728	2.4178	-0.1684		1.83018	-0.61791	-0.87979	-1.93779	-1.36691	1.7138	0.745694	0.97692	1.57413	0.002349	-2.02419		0.332389	-1.23413	1.43029	-0.02145	-0.21268	0.305755	2.79559	0.916576	1.38468	1.13591	0.58886		-2.86655	-2.07485	-2.14374	-0.32194	-0.4423	-0.94547	1.00587	-2.09087	-1.4129	-0.45996	-0.71721
176	0.766028	2.70894	3.77883	17.7855	0.078764	1.66239	0.514325	2.62834	6.37763	3.07237	-0.5885		-1.23533	-0.34482	1.2048	-0.89019	0.888156	2.87439	-0.15929	-0.38394	-1.22841	-1.88015	-1.54842		0.069601	-3.0085	-0.2725	-0.11632	-1.01902	-1.42106	6.75389	-0.62751	6.30476	2.6567	1.23837		-0.82719	-1.04001	-0.78966	-1.54389	-0.92568	-2.60295	0.50869	-2.47877	-0.31799	-3.12559	-0.71138
177	1.0497	2.80689	6.18155	15.2468	-1.86496	0.279733	0.428886	2.62467	7.12522	1.14852	0.617388		0.943724	0.660127	-0.00924	-1.3399	0.636037	-0.38473	-0.94917	0.421748	2.10752	-0.9304	-0.26078		0.287241	0.296086	1.03881	1.62842	1.82799	0.130218	7.87712	-0.6602	3.61522	-0.05781	0.171685		-0.90561	-0.1901	-0.97849	-1.86185	-1.45764	-0.40092	-0.43112	-0.65563	-1.56059	-1.64895	0.251444
178	-0.38374	5.57106	6.73282	16.8394	-2.26214	0.677934	0.269158	0.721559	7.72861	1.29758	-0.58084		-0.60252	0.333579	-0.56931	-1.65118	1.95371	2.84504	-1.13584	-0.08741	0.541761	-0.30373	-1.72621		1.25951	-0.25027	-1.74057	1.62	-1.38851	0.834135	5.47477	0.821833	4.30502	-0.27351	1.37554		-0.22253	-1.76142	0.535136	-1.97713	-0.51939	-0.75136	-1.12045	-1.0007	-0.95178	-1.92758	0.04026
179	-1.49319	6.08488	1.48719	13.7968	-2.40337	1.96077	0.108303	0.066231	7.04092	4.31598	0.646446		0.031357	0.280015	-0.65222	-1.67768	2.07594	0.929802	-0.94063	3.30432	4.33818	-2.1091	-1.9318		1.47626	-2.16337	-2.29726	1.64488	-1.87146	-0.96554	4.14699	1.96663	5.1086	0.363025	0.443415		0.941023	-2.37728	-2.00687	-2.42248	0.030902	-4.88832	-1.51609	-0.44765	-0.56598	-2.82916	-0.08237
180	-0.47897	8.50799	3.98848	12.6525	-0.63487	1.10928	5.67233	-0.48054	8.60425	2.77681	0.416493		0.588551	1.61756	-1.2016	-1.5361	0.382576	2.81585	-1.09518	2.63264	2.23709	-0.58972	-2.38057		2.18627	-1.12661	-0.07028	1.42591	-0.71654	0.473746	5.52577	1.05147	4.26685	-1.38444	1.30963		-1.55531	-2.15247	-2.46512	-1.99017	-0.8912	-2.84605	-1.57805	-1.61843	-2.35422	-3.31193	0.571325
181	1.31702	11.0449	7.56825	11.1344	-2.36238	0.386026	4.35892	2.09134	5.62665	0.957404	-0.27412		0.804222	1.35132	-0.41071	-1.12799	0.261698	2.43854	-1.24216	1.13483	2.4528	-0.63133	-2.09304		0.028681	0.897648	2.33081	0.491794	-1.49409	1.13407	5.32038	12.9153	5.54487	1.07781	0.205885		0.648052	-1.12555	-0.20729	-2.03706	-0.94942	-2.73123	-2.15469	-1.50142	-0.68329	-3.61642	1.42489
182	0.839853	10.6196	5.50554	17.0292	-0.73955	0.285833	5.47348	3.89109	7.15204	1.96375	1.85514		3.06565	1.68324	0.243	-0.89399	-2.19644	3.95081	-1.61324	1.51253	1.49549	-1.67165	-2.48106		-1.24139	0.141583	-1.57048	3.52829	0.215893	2.12924	8.47917	22.6976	5.63542	1.77404	1.15274		-2.1628	-0.84917	-0.95123	0.231015	-0.89693	-3.09193	-1.9452	-0.39789	-3.17406	-0.34195	-0.09328
183	1.5372	13.2811	3.51607	18.531	-3.125	0.23966	6.64655	4.99744	6.87542	0.580925	0.613451		-0.19649	0.043199	0.032591	-0.87146	-0.12757	3.7041	0.635332	2.32907	1.20557	-1.07944	-1.94892		2.36699	-0.1274	1.16921	0.116658	1.3366	0.492825	12.7598	14.0716	5.36732	0.23566	1.4498		-0.49798	-1.94698	-3.80912	-0.15721	-0.26483	-0.60987	-2.02672	-1.70055	-0.57549	0.170536	-0.84218
184	-0.70461	13.5996	3.53727	15.5626	-3.06541	1.29461	4.10327	2.72105	8.50328	1.38785	0.381309		1.43163	0.323663	0.979871	0.092569	-3.46689	3.60525	1.33196	3.62805	1.95767	-0.91062	-1.28154		0.960235	-2.29481	1.79973	-0.48238	-1.23546	2.20283	17.0129	10.258	4.10742	-0.83445	0.606287		-1.77107	-2.23214	-1.8016	-0.00105	-0.10599	-2.08957	-1.98066	-1.98597	-1.48649	-1.73683	-1.58486
185	-0.9835	12.9616	4.81697	16.068	-1.01303	0.502312	4.20304	3.59755	7.03828	3.07263	0.950471		-0.8381	1.9552	0.112331	-0.49881	-1.50225	2.39398	1.27305	2.83893	2.98076	0.702571	-1.26703		1.04953	-0.37433	0.601979	2.70862	-1.9405	0.763269	14.8682	16.7047	5.32712	4.10562	1.60664		-2.28585	-2.5768	-2.17107	-0.77144	-1.08147	-3.67269	-2.09156	-1.7086	-2.40368	-2.86215	0.006497
186	-0.26951	13.4713	10.9327	14.5091	-2.33245	1.54487	6.88702	1.49479	8.58116	2.11992	1.03512		3.32278	0.152099	0.03501	-0.94981	-0.06463	0.890896	0.7246	1.5142	2.98612	-1.39211	-1.33443		-0.30213	0.836049	-0.76587	1.59436	-2.00308	-0.34639	8.95695	9.39653	4.88281	5.32715	-2.43826		-0.59801	-0.43092	-0.35023	-1.00792	-0.58549	-0.49587	-2.20809	-1.86722	-0.97799	-1.06591	1.6502
187	-2.04974	14.2262	6.85452	15.771	-2.77185	1.84927	8.26028	1.5382	8.7301	1.6893	0.454064		0.433905	2.78026	-1.09428	-1.11489	-1.31494	1.56312	-0.19633	-0.3328	1.11188	0.986084	-0.79086		0.904874	-1.20286	-2.41977	1.9454	-2.08146	2.47684	4.90176	7.02528	5.10674	2.1713	1.71711		-1.45951	-1.58166	-0.74465	-1.59841	0.346949	-2.15261	-2.17719	-1.84668	-2.94646	-1.17736	-0.27338
188	0.307315	14.4127	5.5205	17.9507	-0.89466	-0.97516	5.29343	0.150941	8.4915	0.206947	0.759079		0.306402	1.6688	-0.26744	-1.04484	-0.3429	4.68206	-0.73342	1.79851	0.019235	0.327845	-1.08325		0.702771	0.078163	-1.27974	3.63467	-1.22534	-0.70163	5.24998	5.03353	6.01995	2.89662	-1.15887		-0.18616	0.026879	-0.80968	-2.46643	-0.30867	-0.31368	-2.19407	-0.87281	-0.89678	-2.70411	-0.41639
189	2.06511	15.3491	5.61255	15.1513	-3.86829	0.496469	2.95603	-0.05351	6.35263	0.435428	-0.05751		1.66407	1.42391	0.460344	-1.45054	1.47146	2.9403	0.722657	0.938366	0.233033	0.431277	-0.63568		-1.07529	-0.69783	-0.08877	1.2573	-1.62769	0.113708	3.81916	5.30361	5.90283	1.41203	-0.88388		-3.48944	-2.51632	-1.46262	-2.29205	-0.24772	-3.50574	-1.99315	-2.51896	-2.33153	-2.42562	0.283338
190	-2.3536	15.4217	2.7648	19.5264	-3.68797	-0.00381	1.25113	0.176974	11.0048	2.29553	0.859465		0.488997	0.874441	0.525424	-1.16811	1.30508	2.49723	0.766936	0.579957	0.549907	0.107997	-0.69733		0.038152	-0.29367	2.5538	0.6077	0.152781	1.47994	2.00503	3.52658	5.63955	-0.85675	0.46766		-0.84668	-2.72617	-1.51511	-1.57203	-0.37882	-5.39916	-1.99537	-2.41604	-1.26605	-2.13413	-0.71048
191	-0.38467	16.7709	3.73787	17.9662	-4.30094	0.924645	1.29346	-1.14612	7.92137	3.65032	0.807455		0.427377	-0.05265	-0.75596	-1.36542	0.368931	2.9462	0.082692	1.44384	0.199061	0.626723	-1.48109		-0.61442	0.169252	2.13907	-0.56335	-0.801	0.697567	3.09127	1.71422	4.3084	-0.36579	2.16424		-0.87054	-1.61838	-1.57545	0.015751	0.54695	-2.8107	-1.95741	-2.78816	0.012019	-1.49361	-0.48809
192	-0.16684	17.0092	1.876	18.8658	-2.61342	-0.36003	-0.07121	8.25349	7.68262	2.01209	0.625971		1.64376	-0.00142	-1.14129	-1.44475	1.03244	3.8166	-0.07538	0.084468	1.17393	0.2926	-0.47408		1.53514	0.539468	1.68055	1.45643	-0.92348	-0.73925	1.26223	0.882124	1.89411	0.305316	-2.01615		-1.87958	-2.0706	1.52188	0.483037	-1.61804	-3.45758	-0.02525	-2.49926	-1.53159	-2.25655	-0.14724
193	-0.73933	15.4453	2.56542	18.5826	-3.61855	-0.19842	0.344506	7.55763	9.7622	0.523834	-1.63768		1.76994	0.141636	-0.09011	0.721167	-2.65339	3.03464	-0.09379	0.530959	0.734073	-1.77531	-1.21634		0.244985	-1.93544	2.0172	2.34473	-2.65379	2.21903	0.24724	1.91624	6.92544	-0.63286	2.18412		-2.52146	-2.47781	-1.6429	0.815586	-0.95146	-4.69748	0.109313	-2.13029	-1.31082	-1.50534	-0.05267
194	0.800986	12.6734	3.00751	17.3734	-3.01933	1.12491	-0.4192	4.00398	7.64399	3.16013	-0.23509		0.633851	0.450434	0.995618	0.839636	-0.03249	1.14143	-0.53702	1.0148	1.95403	-1.71043	-1.58277		-0.61675	0.153641	-1.6325	1.72872	-1.94518	1.51715	0.607781	1.14812	3.98522	0.851127	1.19554		-1.23489	-2.09939	-1.28103	-0.22578	-0.98858	0.384288	0.264961	-1.17119	-0.66573	-2.71681	-0.44594
195	-1.60154	13.8374	1.72861	13.0041	-0.43589	0.370862	-0.28401	3.09494	8.08649	1.97741	0.651236		2.30582	0.106681	-0.23478	0.721731	-0.77866	4.93623	-0.57712	1.91037	-0.76442	-1.55293	-0.9933		-0.12949	-0.40457	-0.36786	1.57331	0.940115	0.549627	1.46417	0.526245	4.96465	-0.98618	0.56879		-0.93955	-1.22155	-0.46444	-0.9956	-1.30848	-2.76795	0.122268	-1.59651	-2.29872	-1.05575	1.43398
196	-0.84883	12.249	1.34192	15.2311	-2.89794	2.33987	0.314528	1.58208	6.80774	4.27334	1.3066		1.81966	1.87321	0.477312	-0.7532	-1.10276	5.55415	-1.25744	4.19177	-0.087	-0.37203	-1.41654		0.358602	0.273793	0.238379	1.99572	-2.19641	3.11353	1.18922	-1.29745	3.31086	0.375216	1.6272		-3.31664	-1.53491	-1.2876	-1.05839	-0.14401	-2.72797	-0.75924	-2.40551	-0.25187	-2.15817	0.174157
197	0.651991	9.03221	1.08699	13.1696	-2.53234	-0.57329	0.485354	2.33565	8.63158	0.638531	-0.95094		2.77109	1.56005	-0.87651	-0.0418	1.08213	1.76544	-1.28921	3.52734	2.45598	-1.32752	-1.52808		-0.97502	0.331582	1.28123	6.45745	2.21128	1.06961	1.13746	0.427683	6.14035	0.909348	2.75559		-1.84347	-1.96362	0.213714	-1.92474	-0.06236	-2.33868	-1.19667	-1.03604	0.944725	-2.08704	1.21946
198	1.64849	10.8019	3.83505	14.5047	-1.18851	0.442387	1.45144	2.06614	9.38846	2.81337	-0.89467		3.08748	2.85097	-0.40085	-0.37087	3.56983	3.87534	-1.33454	2.79578	2.0508	1.4184	-2.0371		-0.31705	-1.0079	-0.44418	6.50725	0.570729	-0.6608	6.35201	-1.09615	4.47509	1.62621	2.21963		-1.82833	-4.03426	-0.70747	-1.72815	-0.01907	-2.90479	-1.60552	0.006247	-1.19343	-2.26395	-0.01773
199	-0.89469	13.1535	2.82298	12.0347	-1.18158	-0.17808	5.5487	0.994793	8.64966	2.67921	1.614		1.8836	2.68963	0.326069	-1.17908	1.46315	2.64175	-1.65983	0.118467	0.374967	-1.55955	-1.91586		-1.0418	-0.28158	0.583692	2.54772	-1.43614	-1.66235	17.0318	1.6064	4.58943	-0.87941	0.571612		-2.29852	-4.32404	-0.55623	-1.39086	1.18584	-2.59451	-1.65182	-0.39534	-1.43048	-3.19673	-1.36257
200	-0.40333	12.7704	2.95591	13.5393	-2.1806	-0.24301	2.97812	1.53353	9.19605	1.13754	0.464415		1.4847	1.64279	-0.64517	-0.77203	-0.7035	2.61922	-0.78003	1.95304	0.557996	1.00614	-2.26054		-1.92819	-2.02477	0.131103	0.898871	-2.28883	0.454413	16.1302	0.775082	4.52821	-0.81822	0.529849		-3.09518	-2.78634	-2.65525	-0.28664	0.290889	-1.94678	-1.99669	-2.33447	-2.30525	-2.21843	0.663188

## Sheet: 5d-AUC
	Water
AUC	Neuron#1	Neuron#2	Neuron#3	Neuron#4	Neuron#5	Neuron#6	Neuron#7	Neuron#8	Neuron#9	Neuron#10	Neuron#11
-Antagonist	856	351	159	164	102	169	137	130	90.7823	86.1772	158
+Antagonist	4.1472	-0.47536	-30.4429	10.6846	17.0971	50.3398	35.901	2.62903	19.5267	-2.44143	-23.1134
	VIP
AUC	Neuron#1	Neuron#2	Neuron#3	Neuron#4	Neuron#5	Neuron#6	Neuron#7	Neuron#8	Neuron#9	Neuron#10	Neuron#11
-Antagonist	594	228	422	81.1	195	102	488	870	91	98.2	61.8
+Antagonist	-60.6603	-18.0665	-22.8448	-51.832	9.99443	12.8512	23.9817	160	-2.21396	0.205976	-19.6052

## Sheet: 5e
	VIPR1						VIPR2
	Mouse#1	Mouse#2	Mouse#3	Mouse#4	Mouse#5	Mouse#6	Mouse#1	Mouse#2	Mouse#3	Mouse#4	Mouse#5	Mouse#6
HPA	0.280292	0.041912	0.013177	0.081721	0.015924	0.025613	3.59516	0.580486	0.545115	0.402146	0.864665	1.37085
Liver	0.329141	0.120049	0.090172	0.469761	0.057809	0.082753	0.000866	0.000663	0.000379	0.000334	0.002052	0.000974

## Sheet: 5f
	Saline	VIP	Water
Frame (1.288365sec per frame)	0.432655	1.39831	0.34682
1	-0.637508	0.585394	-0.536642
2	-0.103433	0.860615	0.00923364
3	0.72188	0.573205	-0.955321
4	-0.81036	0.178947	0.126351
5	-1.02965	0.302984	-0.274131
6	0.555209	0.152032	0.029591
7	1.42133	-2.24203	-0.346514
8	-1.26461	0.328312	-0.684997
9	-0.397051	-0.290014	-0.453887
10	-1.17155	-0.797872	-0.996519
11	-0.893538	0.265309	-0.250521
12	1.15053	-0.859844	0.0714356
13	-0.71748	0.00429773	0.0956414
14	1.01069	0.0044646	0.13835
15	-0.168129	-0.576924	0.230173
16	-0.233925	2.47982	-0.143045
17	2.5004	-1.33884	-0.77365
18	0.382821	-0.607738	0.526645
19	-0.748278	-0.420418	3.84099
20	-0.511557	-0.612347	2.34978
21	-2.16677	1.25211	2.98944
22	-1.09653	1.46209	1.03264
23	0.0414552	-0.686826	0.987248
24	0.0510808	0.0269797	0.434342
25	0.934621	-0.327731	0.290371
26	0.542023	-0.481241	0.00191023
27	0.923154	0.566489	0.612553
28	1.72329	-1.41862	0.101809
29	-0.527015	-3.00138	-0.477598
30	-0.551434	-2.00189	-0.765032
31	0.651819	-3.67962	1.04433
32	-0.0319411	-3.55828	-0.403243
33	-0.900277	-4.85048	-0.601197
34	-1.39226	-3.20193	-0.785369
35	0.830317	-2.74143	-0.389028
36	-1.95674	-4.33268	0.731036
37	-1.11485	-4.77887	-0.253019
38	0.240641	-6.06031	1.08297
39	-1.50973	-4.15539	-0.0310062
40	-0.672118	-4.78051	0.318489
41	1.66449	-4.99711	-0.544952
42	-3.28554	-4.20786	0.267309
43	-0.298595	-3.98076	0.557766
44	-2.52587	-3.29146	-0.437599
45	0.250027	-5.80159	2.82201
46	0.632607	-3.93873	3.64224
47	2.03922	-3.0737	3.12059
48	2.20521	-2.78061	3.61499
49	0.00552508	-2.95559	5.11249
50	-0.779325	-0.9842	6.35873
51	0.426819	-0.289948	8.2463
52	-0.752075	0.699326	5.56688
53	0.549684	0.17274	2.80982
54	0.995747	4.10834	1.60529
55	0.519241	4.01987	0.32948
56	0.0525236	5.78216	0.119786
57	1.4255	6.10093	1.07079
58	-0.680646	7.72427	5.23638
59	-2.23958	7.64972	5.34141
60	0.543235	9.45044	6.54698
61	0.539543	10.5882	5.8914
62	0.592992	12.3569	7.36012
63	-2.21296	12.1325	8.47506
64	0.496099	13.3553	8.69229
65	1.23196	13.9889	4.85874
66	0.200488	13.8975	9.85864
67	0.743102	17.3159	9.6531
68	-0.239128	18.6074	11.1075
69	-0.528702	17.3391	12.7811
70	-1.2533	17.4324	12.6279
71	0.695925	17.5773	12.3097
72	-0.755784	17.3178	16.0893
73	-0.636102	19.7956	14.3682
74	-0.00914438	19.1359	16.4163
75	-0.773575	19.8822	14.5894
76	0.901964	19.3892	16.4876
77	0.0109832	20.1778	15.8277
78	0.749366	21.0809	15.3909
79	0.985503	20.3733	18.1994
80	-0.308141	21.3559	16.881
81	0.366965	21.2888	16.7222
82	0.871607	21.5327	18.4174
83	-0.424612	20.6399	19.8454
84	-1.15071	21.5343	18.503
85	-1.27066	20.9143	18.4818
86	-1.95203	20.3806	18.3061
87	-0.902614	21.2159	17.6173
88	0.685911	21.2378	17.5187
89	0.391215	21.145	19.2102
90	-0.168857	20.7477	18.1974
91	-0.745317	20.765	17.846
92	0.0494228	21.087	22.076
93	-1.20789	22.3217	18.8986
94	-0.974194	21.3185	19.4406
95	-0.123566	20.2841	17.6343
96	0.35209	21.0199	21.2139
97	0.707138	21.1785	20.028
98	1.74571	20.3601	22.5236
99	0.132691	20.24	19.0345
100	-0.953224	19.6599	20.8201
101	-0.729812	21.0125	20.6576
102	0.834405	20.1217	18.8862
103	0.756202	20.5542	17.18
104	-1.07301	19.6576	17.9862
105	-0.431533	21.4076	16.9826
106	-1.7035	20.7085	15.8416
107	-0.142095	20.1492	14.866
108	-1.50815	20.6144	13.5226
109	-0.15891	19.3316	15.8862
110	-0.192839	20.3143	12.5621
111	0.00243492	19.0222	11.685
112	-0.532342	19.6804	14.1688
113	-1.56622	18.3316	11.6424
114	-0.849386	18.7143	11.5942
115	-0.479888	16.8988	12.3558
116	1.65592	17.5182	13.8797
117	-1.00547	17.3826	11.971
118	-1.22033	17.3896	12.4784
119	-1.23274	17.6312	10.2617
120	0.156518	15.6458	10.3957
121	0.796129	15.887	8.5637
122	-1.35595	14.2272	8.51483
123	-1.26155	13.9859	9.31583
124	1.40466	13.715	10.1028
125	-0.703214	13.2044	9.56934
126	-1.07738	13.9351	11.9538
127	-0.715999	11.5164	7.21721
128	-0.285882	11.2398	7.93956
129	0.221515	11.0399	6.90344
130	0.0368497	9.16844	11.3569
131	-0.633969	6.68997	8.8145
132	-1.33088	5.60506	7.19726
133	-1.29356	6.91816	7.40755
134	-1.98493	6.62309	9.26806
135	-1.16403	6.13275	7.52741
136	-2.10013	1.97069	6.1477
137	-1.90426	1.93718	8.74007
138	0.341951	-0.0755546	8.34221
139	-0.528303	-1.53731	8.02066
140	-0.525431	-2.70089	6.33282
141	-0.282546	-1.42677	5.63
142	-1.06927	-0.728827	4.21475
143	-1.57307	-4.33876	5.87801
144	-0.0554813	-4.42382	5.87872
145	0.376328	-1.97777	7.72117
146	-0.0411727	-3.46079	5.95271
147	-1.97193	-3.7339	6.56027
148	-2.68176	-2.36766	5.29398
149	-1.00645	-2.95664	8.82971
150	-0.366073	-2.01679	7.01912
151	-1.07384	-4.23076	8.03531
152	-2.02718	-3.40706	10.104
153	0.111412	-5.43852	8.94466
154	-0.657856	-2.09183	10.2461
155	0.519356	-2.79621	8.46735
156	-0.171901	-2.67866	10.2795
157	-0.975271	0.147727	9.11942
158	-2.06104	-3.79083	10.6471
159	-0.848074	-1.45165	10.2763
160	-1.38575	-3.55739	8.36362
161	0.476983	-6.95489	9.14334
162	-0.146017	-1.82044	7.60403
163	-1.75915	-4.79297	9.90187
164	0.158726	-1.6888	9.17606
165	-1.27885	-1.53931	12.641
166	0.202301	-5.6405	8.36977
167	-0.921534	-7.30642	8.83752
168	0.534925	-7.57355	12.1299
169	-0.984748	-4.70823	9.39308
170	0.708509	-4.45847	9.91832
171	-0.827361	-6.53192	11.8888
172	-0.9862	-7.29444	13.8622
173	-0.0786253	-8.15089	10.3102
174	-0.797396	-4.59121	8.86316
175	1.15619	-5.66808	13.2356
176	-0.853343	-6.40842	11.1794
177	0.283162	-6.55979	12.1939
178	-0.875192	-8.67032	10.7646
179	-1.37016	-7.43468	13.8458
180	-0.721011	-5.49698	10.6744
181	-1.93482	-6.93144	11.7576
182	-2.18781	-9.03336	13.4434
183	-0.481103	-8.51315	11.9413
184	-0.874679	-9.08135	10.784
185	-0.738693	-8.57183	14.644
186	-2.53087	-3.40046	11.9035
187	0.305847	-5.10221	10.4004
188	-2.73609	-7.5785	11.8782
189	-2.31451	-7.27739	14.025
190	-0.801854	-6.60108	13.1122
191	0.273062	-8.52456	12.2903
192	-0.833451	-8.65259	10.5455
193	-1.96257	-9.04282	12.7696
194	-0.404564	-8.30595	11.8239
195	0.536652	-9.10734	15.0537
196	-3.03921	-8.52253	11.993
197	0.01579	-9.02886	11.0528
198	-0.479527	-4.86529	12.5047
199	-0.662541	-7.97829	14.8427
200
