# Supplementary material for: Sensory representation and detection mechanisms of gut osmolality change
Source: Springer Nature journal article supplement (doi:10.1038/s41586-021-04359-5), 2022-01-26
Supplement: MOESM7 [file 41586_2021_4359_MOESM7_ESM.xlsx]

## Sheet: 2b
Number of cells
Before SVx		After SVx
Water	NaCl	Water	NaCl	Distension
153	107	6	4	4

## Sheet: 2f
	Intestine				Stomach
	Mouse#1	Mouse#2	Mouse#3	Mouse#4	Mouse#1	Mouse#2	Mouse#3	Mouse#4
Water	22	59	16	44	2	11	1	1
Distension	21	23	18	13	73	40	19	32
Saline	2	8	3	1	2	0	0	3
