# Supplementary material for: Sensory representation and detection mechanisms of gut osmolality change
Source: Springer Nature journal article supplement (doi:10.1038/s41586-021-04359-5), 2022-01-26
Supplement: MOESM9 [file 41586_2021_4359_MOESM9_ESM.xlsx]

## Sheet: 7b
Overlap%	HPA vs HPA	HPA vs Intestine	HPA vs Stomach
Mouse#1	98.5	30.888	14.939
Mouse#2	94.3	38.403	23.4568
Mouse#3	99	27.4336	12.8617

## Sheet: 7c
Average number of cells from 3 sections per animal
	Sham			Phenol denervation
	Mouse#1	Mouse#2	Mouse#3	Mouse#1	Mouse#2	Mouse#3
HPA	21.3333	30.3333	29.6667	19	44	36.5
Intestine	26.6667	26.1667	31	3	5.83333	13.6667

## Sheet: 7d
Number of cells	Before	Lidocaine	After100min
Mouse#1	21	1	5
Mouse#2	8	1	5
Mouse#3	50	24	27
Mouse#4	38	13	17

## Sheet: 7d-2
Mean DF/F
	Before
Frame	Neuron#1	Neuron#2	Neuron#3	Neuron#4	Neuron#5	Neuron#6	Neuron#7	Neuron#8	Neuron#9	Neuron#10	Neuron#11	Neuron#12	Neuron#13	Neuron#14	Neuron#15	Neuron#16	Neuron#17	Neuron#18	Neuron#19	Neuron#20	Neuron#21	Neuron#22	Neuron#23	Neuron#24	Neuron#25	Neuron#26	Neuron#27	Neuron#28	Neuron#29	Neuron#30	Neuron#31	Neuron#32	Neuron#33	Neuron#34	Neuron#35	Neuron#36	Neuron#37	Neuron#38	Neuron#39	Neuron#40	Neuron#41	Neuron#42	Neuron#43	Neuron#44	Neuron#45	Neuron#46	Neuron#47	Neuron#48	Neuron#49
56	44.9533	0.559037	-0.44049	-0.16706	0.119956	4.32615	35.8792	0.223736	-0.94175	0.081264	-0.19292	0.626352	-4.04976	-0.45577	-1.29181	2.14615	13.2452	0.564159	0.78757	-1.38427	2.90336	1.21627	0.224241	1.94542	1.83322	11.8531	3.11021	0.710147	-1.45044	1.29553	2.90034	1.50306	-0.26991	0.874017	1.04323	4.99753	-1.44646	1.93287	-0.35444	1.52146	1.74412	-0.51012	0.120983	-0.42194	0.012667	-0.6009	-1.46832	-1.89683	0.685835
57	48.6155	0.883375	-1.09066	1.77773	0.900591	7.01143	31.662	0.256369	-1.18709	1.91145	-2.08098	0.517457	0.931759	-1.04198	-0.83149	4.59944	19.9944	-1.04187	0.462833	-2.40109	2.07545	21.432	2.8451	0.695463	2.79465	12.0499	3.04354	-1.12965	-1.90521	-0.07287	1.23835	-0.76346	-2.34502	-0.75527	0.191553	3.89453	-1.50155	1.10824	-1.4479	1.11833	1.47011	-0.70987	-0.5666	-0.36295	1.03861	0.699512	-0.66021	-1.11006	-0.33681
58	35.9958	1.21603	0.093289	0.509616	-0.29567	3.70386	21.9445	-0.48725	-0.1487	-1.12053	0.195185	-0.99674	-0.99554	-1.58465	-0.22492	2.46563	13.8623	2.15504	0.871467	-3.00209	1.79392	9.59776	2.86675	0.191698	1.90302	8.77537	1.91577	-2.39423	0.329772	1.1737	2.00939	1.30817	-0.8164	-0.98542	0.566236	1.84729	-2.60152	0.533063	-0.72089	-0.78824	1.70633	-0.1047	-0.51965	-0.87771	-0.45816	-0.99031	-0.70615	-1.17713	0.408889
59	25.5018	-0.27999	-0.35127	0.284764	1.73575	1.69002	30.2873	1.72023	-0.7865	0.049443	1.57144	-0.11882	-2.31412	-0.26848	-1.28064	0.438735	24.2572	0.488389	1.86354	-0.34695	0.366105	3.45311	1.80169	-0.62779	-0.65462	4.42814	2.13837	1.25644	-1.66742	1.69036	1.50374	-0.07814	0.017645	0.60819	1.57942	5.22998	1.29194	-0.01468	-0.41749	-0.00342	-1.08901	0.634811	0.39582	-0.58733	-0.82137	1.22339	-0.33334	-1.17635	-0.96713
60	23.5402	0.663522	-0.50514	-0.18588	1.42363	0.03151	29.3947	-0.59604	0.44593	-1.21744	1.02458	-1.61032	0.470541	-0.29432	-1.40779	2.1931	21.7058	0.682243	0.44633	-2.5783	1.93463	1.17386	0.345933	1.06404	-0.65176	2.34026	0.786547	1.18491	0.62501	-0.71358	-0.50168	-0.76454	1.09687	-1.06125	1.86844	2.11516	-1.10917	2.26796	-1.30377	1.41815	1.07674	-2.31475	0.182426	-0.68311	0.931753	1.15064	1.05559	-1.80729	-0.35229
61	14.7395	0.185181	-0.43964	0.524019	1.41619	0.764404	28.9659	-0.06606	1.73545	1.48494	-1.37437	-3.6241	4.51272	-0.49765	0.316095	2.3536	17.4895	-0.67783	-1.91575	-0.48088	2.23121	0.976423	0.78043	7.30831	0.906027	1.1757	-0.64069	1.10262	-2.07491	-2.06451	0.710715	0.7701	-0.13645	1.35615	0.434089	4.77931	-1.4922	2.59709	-1.8304	0.411991	1.09687	1.88577	0.457509	0.313299	1.3011	2.45177	0.759932	-0.47334	-1.10416
62	14.7263	-0.22316	-0.68618	0.809972	0.64833	0.33046	28.7617	0.035713	0.811513	0.066213	1.10774	0.505977	2.56534	-0.62247	-0.12631	-0.90712	22.6345	-0.64779	-2.23465	-0.5467	1.20441	0.386446	-0.84874	11.0978	0.672873	1.56597	-0.14679	1.1538	0.796654	-1.79039	2.99417	0.531253	0.796385	1.8971	0.584717	3.80843	-0.73669	1.01321	-0.67005	0.009202	0.07989	-1.06508	1.24323	-0.3659	-1.27505	0.970603	-0.08552	-0.95147	-0.59868
63	9.46583	-0.34463	-2.14113	-1.20865	-0.38667	2.27475	30.3619	-0.08596	-0.70877	-0.65338	-0.06942	1.13159	-4.03999	1.14319	-2.01253	0.711675	16.4928	-0.13642	-1.2662	0.068501	2.96977	1.03841	0.481386	11.5395	1.41148	0.336307	-0.27163	-0.70809	-0.26778	-0.63362	3.19514	-0.78156	1.37089	0.932222	0.252483	2.77629	-0.54913	-0.2393	-0.26028	-0.2213	-0.5972	-0.41836	-1.07632	0.19252	-0.06783	1.02228	-0.41228	-1.11155	-0.71965
64	7.76865	-0.19117	-0.44625	-0.04893	2.0449	10.7399	27.1946	-0.47642	0.086464	1.11672	-0.45442	0.44478	-0.02305	-0.08442	-0.8644	4.31258	12.0126	3.03889	-0.04962	1.06069	1.75678	0.470967	1.31099	5.14253	0.510549	2.61185	2.23549	3.59292	-1.36498	0.730195	0.121439	-0.5832	-0.65211	2.39149	1.51547	1.23544	-1.02646	-1.09336	-1.50897	-0.60016	-0.29409	1.07977	-0.07785	1.03673	-0.51073	1.2864	-1.05124	-1.24248	-0.13651
65	7.05031	-0.44409	-0.59472	-1.26732	-0.26349	8.7265	23.2847	0.587197	-0.39699	0.263204	-0.22067	0.313095	2.9681	-0.20585	-0.37261	2.78583	16.7274	0.038163	0.036117	0.037109	1.15485	1.68108	1.41173	3.59799	0.95374	1.18563	3.1108	1.95593	-0.67142	1.46113	1.41319	-0.85302	-1.09775	0.789404	0.365372	3.73459	-0.67751	-0.35051	-1.26075	0.540973	0.816117	-0.55704	0.488115	0.314117	2.93815	0.73331	-0.6992	-1.0735	-1.79471
66	7.27225	0.042332	-0.07016	-0.35304	1.54736	15.1557	15.1372	-1.00595	1.31478	1.70602	0.769557	-1.121	-2.6751	-0.11393	-1.68402	5.63815	18.5387	1.31913	0.496623	0.951284	0.852162	-0.47447	0.860274	2.04509	1.81431	3.24866	1.66779	1.72327	-1.65389	0.220686	2.09064	-0.4825	-0.99183	-0.31874	1.34511	3.83117	-1.48204	-1.81602	-1.57272	-0.8735	-2.44874	1.56227	1.14432	0.779641	0.234407	2.05135	-0.01062	-0.34655	-1.06072
67	5.67763	0.402961	-0.09144	-0.73181	1.34686	9.82787	10.3139	1.40896	-0.81438	1.87027	-1.13854	0.935362	1.29329	0.463378	-1.82286	3.89173	17.3815	1.27945	0.00968	-1.43864	2.198	0.313232	1.44426	0.887931	2.89626	2.74641	0.563618	1.58269	-2.04121	1.05418	1.95228	1.81544	-2.04154	-2.36365	0.051186	2.54517	1.38111	-1.14204	-0.33782	-0.90333	-1.76344	2.43932	0.783952	0.226838	-0.88053	-0.48531	0.594608	-1.05634	-1.74622
68	5.78617	-0.17054	-0.94725	-1.406	1.33053	7.35187	7.99685	0.349242	0.873743	0.890964	-0.07023	1.47396	1.76802	-0.86611	-4.04179	1.1428	16.0989	-0.5894	2.07364	-1.8166	1.04935	-0.10635	1.32188	1.13603	-0.04109	2.9189	1.8296	2.10203	-3.31392	-0.65423	1.27083	0.489197	-0.19292	-1.83361	1.50178	3.08461	-0.20598	-0.16791	-2.17208	-0.7072	-2.14109	6.55215	-1.21837	0.079575	1.13233	1.38702	0.358112	-0.71605	-1.19196
69	2.84213	-0.30409	-1.04118	0.008858	-0.89124	3.26166	4.31202	-1.02219	-0.0328	-1.89642	0.108501	0.724624	-0.3022	0.431168	-3.61194	-1.63713	17.7034	0.11441	0.930614	-0.8948	1.14997	1.22816	1.36834	0.594189	2.03771	2.26246	0.979981	-0.05563	-2.8601	0.754688	1.13905	0.63617	0.436512	0.023733	2.76435	4.01993	0.19532	0.958622	-0.16841	-0.94251	-1.44459	1.94143	0.783844	4.43139	-1.36112	0.608261	0.266596	-0.36686	-1.43051
70	3.5433	-0.64091	-0.59409	-0.93768	1.01232	3.06588	6.63457	0.20246	-1.09872	-1.43735	0.108349	1.57263	-1.08643	-1.41614	-0.51266	1.04063	18.395	-0.68903	0.291653	0.259259	1.661	0.35534	2.9129	0.936986	1.50877	2.57131	2.12541	0.629764	-0.42668	0.751437	1.57859	1.25479	-0.45018	-2.55589	-0.05034	4.61645	-1.41715	0.561409	-1.26544	-0.89318	-1.37006	0.912347	-1.66102	0.445525	-1.06881	-0.13333	-0.49066	0.160592	-1.2107
71	2.12679	-0.25131	-1.12437	0.02598	1.16031	0.703538	25.5663	1.40328	-0.48878	0.743115	0.125806	0.746201	-0.78204	0.053488	-1.86724	0.709461	11.7968	-2.48907	-0.18205	-0.63309	1.50703	1.80321	1.15079	-1.75469	3.92584	1.87262	2.14136	1.05922	0.834087	-1.66148	1.32885	1.72165	-0.23705	-0.47905	0.140457	2.80142	0.173492	0.071614	-0.79518	-1.00594	-3.57326	0.315102	-0.01053	1.42906	2.38635	0.82855	0.971647	1.86988	-0.67472
72	2.06096	-0.08548	-0.99237	-0.06037	-1.53847	1.86449	23.8807	1.843	-0.88605	-2.33084	-2.25516	0.057418	-0.21047	-1.45364	-1.27307	0.303157	9.59643	1.15084	-0.88727	-1.16737	1.21792	0.345302	0.111372	-0.8255	2.32976	1.60736	1.40095	1.53918	-1.06299	0.038702	0.382092	2.01756	0.167952	-0.10722	0.922182	3.70963	-1.01371	-0.18599	-1.4231	-1.05924	-2.40079	-0.55923	1.17407	1.21341	1.97163	0.658837	-0.93943	0.101943	-0.70309
73	1.56543	-0.00898	-1.09367	0.256273	1.87663	1.11209	28.5995	-0.24164	-0.4087	2.85853	0.834643	0.740007	-0.89054	-2.06042	0.477813	-0.69999	12.1398	-0.56438	0.005924	0.297672	1.11489	1.79842	0.516692	0.222028	1.57506	0.489118	2.27531	2.23795	-0.69154	-0.84267	0.624114	0.263126	0.634256	0.75059	1.15729	1.95083	-0.10279	1.66789	-0.90493	-0.04441	-0.92487	0.638002	0.541905	0.690903	-0.26352	1.32252	-0.37039	1.13273	-0.97058
74	3.53608	0.073586	1.17731	-0.49985	0.806205	3.2816	39.7303	3.44175	0.02798	0.015716	-1.30111	0.013432	-1.51723	-2.316	-1.87	-0.42435	11.1412	0.714184	-0.04577	-1.79136	1.83916	-0.83531	-0.10567	-0.19212	1.91166	3.40219	3.20504	2.22103	0.467656	2.39071	3.58804	1.70227	-0.29094	1.1581	0.07827	4.89065	-0.66698	-0.11267	-1.90106	1.11874	-0.33637	-0.43093	1.03717	-0.11262	0.098855	2.82445	-0.29985	-0.22519	-0.834
75	2.76346	-0.05354	-0.15417	1.31166	1.75489	3.92365	37.0731	1.86478	-0.77518	0.233532	-1.19847	-0.17473	2.26215	-0.81895	-0.7123	-0.36541	16.1525	0.337878	0.177456	0.758691	3.11019	0.916462	-0.54171	-0.50793	2.56843	2.76706	2.2973	0.217995	-0.25637	0.967254	0.998305	1.88175	6.53923	-0.28315	-0.47857	3.38209	-0.66278	1.58339	-2.00189	1.47622	1.36328	0.505493	-0.83976	-1.45491	0.828876	2.45594	-0.86629	0.098635	-0.64832
76	2.57339	-0.81629	0.771389	0.079466	1.08046	3.4996	42.2224	-0.48027	-1.42025	0.26468	-0.0691	-1.4037	-1.91147	-0.55148	-0.66247	0.107089	22.6229	0.834789	-0.20645	-1.6046	2.07289	-1.23053	-0.01485	0.800758	0.276941	1.90061	2.83496	-0.36462	0.021383	-0.42196	1.87103	0.208123	7.37556	-0.33983	-0.48203	3.66162	-0.31193	0.779366	-1.95933	0.300568	1.49537	-2.27027	-2.34757	0.241764	0.651141	2.6739	-1.65831	-0.34743	-0.57966
77	4.24038	-0.40689	-1.24685	-0.74227	0.000287	2.98119	31.0892	0.712698	-1.61831	-1.17917	-1.78441	0.269441	0.982034	-2.01472	-1.56558	0.205656	15.2158	-1.37984	-0.03748	-0.07823	1.00474	-0.37343	-0.12829	-0.2449	-1.01998	2.99984	3.05544	0.872137	-2.45734	-0.96093	-0.00972	1.33243	6.55505	-1.6004	-0.04198	5.76995	0.394645	-1.39777	-1.31108	0.962977	2.7091	0.048065	2.27922	0.472226	-1.56143	1.86797	-3.03811	1.7477	-0.70566
78	2.69199	-0.33972	-0.88331	0.098472	0.931323	2.51291	37.9157	-0.56904	-1.64042	-1.59805	-1.55694	0.447987	-0.91235	-0.43074	-0.84183	-0.03824	21.9402	0.092468	0.596268	-2.37109	0.644606	-1.32345	-0.51858	0.05896	1.94151	4.3377	2.28602	0.841521	-0.90927	0.850888	-2.07267	0.898053	8.59773	-0.30474	0.842285	4.56374	1.35957	3.43582	0.236393	2.28765	2.51196	-0.92142	-2.02004	-1.65259	0.466867	-1.2762	-0.44829	1.03665	-0.41293
79	1.46945	-0.61731	-0.46364	-0.20175	0.037898	1.16521	45.2224	2.5263	-1.09478	0.07457	-1.71273	-0.15502	-1.78718	-1.23959	-2.82235	-0.88793	22.3823	0.275967	0.942676	-1.37248	-0.46166	-0.83611	-1.46521	-0.82397	2.57705	3.60291	2.72774	0.232943	-3.04017	0.296057	-0.33945	-0.05581	6.3841	-0.02664	-1.24411	4.86627	2.70402	2.01046	-2.53954	0.207237	-0.22612	-0.37499	-2.12028	-1.14186	0.627809	0.243636	0.002412	1.85266	-0.57804
80	2.30483	-0.64948	0.204398	-0.48786	0.31784	6.44822	45.3256	0.1009	-0.57344	-0.90201	1.11691	0.838441	0.860013	-1.45632	-2.44609	1.1	26.0476	-0.99757	-1.28331	0.993024	0.142427	0.458143	-0.6299	-0.70943	1.04522	4.54686	2.6779	0.203053	0.062805	0.173303	0.186746	-0.90975	6.27179	-0.09989	1.03402	5.93557	1.70868	2.15575	-1.5344	0.314392	1.70314	0.347932	3.23939	-0.02551	-0.28676	0.061741	-2.6275	1.43665	-0.17663
81	2.52208	-0.17022	-0.47343	-2.2321	2.84013	8.43399	36.4725	0.080576	-0.65204	-0.10767	2.32728	-0.23169	3.24164	-2.74914	-1.36423	-0.52292	16.625	2.16717	-1.42177	-0.4826	3.59881	0.019239	0.529141	1.36997	1.91327	6.11585	4.54569	9.78749	-1.33497	-0.09525	0.136036	3.18939	7.91716	-0.44769	2.00527	6.4867	3.27083	1.28608	-0.34118	0.879348	1.09834	-0.04868	2.02706	0.993261	0.53531	-1.50884	-0.89961	1.45201	-0.75532
82	1.44601	-0.32172	-0.81121	0.088179	0.910554	18.1732	35.2373	1.90685	-0.58235	4.05122	-2.09303	-0.29979	2.76766	-1.82137	-0.59867	4.12877	24.0371	4.24701	-1.14049	-1.31153	3.13782	-0.82248	-0.77885	-1.22856	2.05139	7.73315	3.62488	14.3637	-1.60373	0.980895	0.790245	3.17667	9.13505	-0.4774	0.206791	5.09167	2.9931	-0.67058	-0.50488	0.454087	1.70523	-0.25766	0.027413	2.25452	-2.25284	-0.07089	-2.01347	1.54101	-0.97235
83	3.55487	0.216779	-0.1121	-0.91386	0.764769	11.6531	41.4708	2.45084	2.80316	4.46179	-1.27746	1.23573	0.798663	-0.96776	-0.42716	3.77974	24.9591	5.04853	-0.31811	0.011682	2.37677	-0.94789	-0.85676	-0.66432	0.742192	6.01253	3.5911	20.3456	-0.44933	-1.41128	0.584681	-0.28362	11.9061	-3.01676	1.53788	4.98098	7.1209	0.711456	-2.28739	0.066744	1.84215	-0.38788	0.879875	4.92368	3.21529	0.169002	-0.85611	2.03499	-0.94851
84	1.05701	0.080488	-0.262	-0.82352	0.532565	8.00472	35.6562	0.270066	4.449	2.21239	-3.55896	-0.57342	-0.5334	-0.52287	-0.85919	-2.03625	24.1944	10.923	-0.0071	-1.54002	1.61588	0.546115	0.249106	0.746889	0.617595	5.48153	2.73015	20.7203	0.151163	0.74451	1.04649	-0.24377	39.9682	1.24958	0.877509	4.80952	5.98116	9.79585	-1.09692	0.854741	2.21472	-0.0377	2.24599	2.12741	-1.40629	4.84082	-1.46569	1.59767	-0.24892
85	1.63018	0.235935	1.17049	-0.91221	3.21542	8.25575	46.8318	-0.93544	0.511946	-0.68147	-1.2812	-0.35119	-0.0245	-2.42942	-3.45608	0.491068	27.1163	17.5274	1.21034	-2.62566	4.54086	0.049506	-0.2744	0.914599	1.97908	5.91062	4.08683	20.5731	-0.75616	-0.19263	2.8766	0.725344	44.5724	2.0808	-1.78513	3.60152	5.06082	6.85564	-1.18879	2.2958	1.10507	-2.50223	0.355606	4.52334	2.33588	6.08082	-0.59031	2.24735	0.343193
86	2.66437	0.610313	-0.2821	-1.53449	2.30265	12.3925	44.1951	4.12326	2.39725	-0.94261	-1.40271	-0.21863	0.492883	-1.38895	-4.63355	1.96039	27.702	13.6817	4.41082	-1.76111	4.74456	0.828294	2.12296	-0.48337	1.40253	7.986	4.11898	17.3908	-0.54955	1.66496	15.0123	-0.17606	36.632	4.46855	1.12075	3.77531	8.41131	5.12462	-0.90555	0.604817	0.407205	0.248405	-0.67089	1.87534	-1.06872	5.60413	-0.03959	1.58776	-0.16441
87	2.78482	1.1037	-1.41131	-1.27259	2.58984	9.97851	51.559	0.007535	-1.34576	0.835534	-2.12603	0.534065	-0.57652	-1.31209	-1.28447	-0.19978	22.5652	3.90517	3.23395	-2.20605	1.78191	-0.43271	4.69561	1.93676	1.93692	8.34682	3.16352	18.8517	0.597206	-2.13618	6.91423	2.74645	26.859	10.6243	0.332534	4.32842	6.83498	5.52382	-1.53475	-0.01772	1.48569	0.141316	-0.43498	1.08755	1.08407	5.13803	-0.28064	2.36639	-0.39498
88	1.57875	0.172744	-0.52666	-0.7633	-1.05645	9.22079	52.8479	7.12329	5.87969	1.35374	-1.72344	1.79471	3.0446	-0.80885	-1.8407	2.88954	32.6697	5.84183	2.70713	-1.30997	2.39858	0.481579	4.0673	-0.50222	1.55414	7.84232	5.58266	18.6621	3.82571	2.37646	21.4637	-0.98051	29.2929	7.57085	1.41487	5.38483	8.21569	1.48898	-1.22788	1.67089	2.35223	-0.19431	-0.49631	0.183929	-0.1519	7.83126	-0.54489	1.10278	-1.10644
89	4.18887	3.21245	-1.12184	-0.0638	0.447237	12.667	52.1885	1.92765	6.66773	4.3727	-2.14192	-0.50708	4.70953	-2.58584	-3.60655	2.23205	34.316	6.41385	0.862433	-0.01629	2.33819	-1.45556	3.80126	-0.19453	2.33034	8.34445	2.39262	17.512	5.49168	-0.14046	9.25555	0.402824	26.9841	8.05401	1.53677	3.83749	9.01101	5.84232	-1.52527	1.23604	0.083584	1.27148	-3.92619	-1.17757	-0.12389	3.37508	-0.03347	0.840966	-0.97905
90	20.7016	2.44179	-2.63043	-0.73373	0.080397	7.81062	51.2811	0.278057	1.88474	5.59068	-0.12416	-0.99863	5.28739	-0.79064	-2.32851	4.91135	36.9624	10.1041	-0.95914	-2.22362	4.42878	-0.11836	1.39584	0.146348	2.20715	8.2597	2.34308	10.8361	4.05781	1.02642	4.5071	2.82861	26.5866	10.6885	1.54772	4.98827	10.6108	4.92667	-1.24808	0.098182	1.88276	3.28996	0.524601	0.793486	-0.50177	0.970516	-0.46279	1.36843	0.863045
91	13.6243	1.7865	-1.62017	-0.3689	-0.29102	11.2922	54.9757	-0.54463	1.23463	4.2228	-1.80393	2.20367	10.5388	-1.84503	-0.24875	10.3078	35.2166	12.7109	-0.27025	-2.88978	4.69127	-0.50612	2.69995	0.411333	0.969947	12.0452	4.52576	16.8368	3.80336	2.2584	5.62239	0.121575	38.1626	17.9557	0.620545	2.95056	11.6225	2.24392	-0.89646	1.34896	0.792586	3.55974	1.84826	0.831502	-0.08927	0.61949	0.62815	0.895995	0.754132
92	10.6953	4.64301	-1.05324	-0.09904	0.029955	18.566	54.813	3.09116	1.45666	5.24385	-1.74671	0.214812	10.9618	-1.90811	-1.21244	10.6693	38.0557	9.90207	0.116743	-1.32524	4.41784	-0.01331	2.75595	2.47973	1.04808	10.547	3.35487	24.6399	11.7287	-1.223	34.0239	-1.74791	42.8821	14.0834	0.67997	4.14888	12.2054	0.612134	-0.211	-0.01755	2.58221	2.48551	3.1459	-0.04756	0.603764	-1.90154	0.847155	0.409216	0.577808
93	43.3082	5.32412	-0.37669	-0.70787	0.362757	27.899	56.3377	8.06571	2.99386	3.72264	-2.85429	-0.1218	10.3855	1.25973	-0.31865	10.9742	37.6689	11.9359	1.13523	-1.0015	4.51034	0.728755	5.82746	2.38246	1.35447	12.7037	4.72228	25.0215	11.3331	0.640765	58.104	2.95593	47.721	14.549	0.672927	7.46688	12.1499	2.81629	2.78147	0.986876	1.63076	2.51821	-0.86688	2.47048	-1.25373	-1.9089	0.71927	0.131347	0.169368
94	34.2248	4.38063	-1.79957	-0.53047	-1.44774	35.6487	53.9043	-0.89908	4.89872	6.04466	1.36734	-2.97668	8.55995	2.02731	-0.369	7.86116	35.6429	14.7782	0.588243	-0.59126	4.34568	0.457085	13.6998	0.593386	0.777331	14.9054	3.2338	28.43	15.5167	-0.97503	34.8668	1.00296	47.1433	14.7198	-0.51468	3.6405	13.1385	0.692284	1.69421	2.67109	1.33075	8.65458	-2.59002	2.00059	-0.98819	-2.01194	0.516692	1.90438	-0.32162
95	20.6275	10.6957	-1.85124	0.810739	-1.35571	37.861	53.9229	-1.57721	47.0421	10.7971	14.6611	-0.59699	11.8146	3.15231	-3.07683	14.5194	37.498	28.4042	1.32444	1.18968	5.12537	2.66467	15.153	0.386812	2.24757	13.5745	3.95669	30.4906	27.2416	2.52548	27.576	0.760558	56.0541	13.0756	0.663615	5.14724	14.4843	6.13065	-0.67076	2.31489	2.94531	7.44685	-0.72973	4.1321	0.531411	-0.47945	0.955299	1.84303	0.133129
96	10.7935	7.62552	-0.03372	1.02896	-1.66254	37.5136	55.7943	4.7565	58.2323	9.70298	32.3904	1.20663	17.286	0.392873	-0.56468	15.3579	37.6403	28.1456	2.34549	3.61121	6.70677	2.07142	15.5928	1.84217	0.591671	15.4012	3.26666	32.7549	33.5074	1.39444	44.6114	0.928797	58.0982	15.821	-0.21751	2.83469	16.3408	12.6783	3.9759	3.31514	3.86764	12.2522	1.17375	4.73426	0.924836	1.26684	0.779069	2.05405	3.37205
97	8.8485	12.8908	-0.13163	-1.1119	-0.25074	45.9152	55.9578	6.64954	70.6924	14.4878	36.5968	1.26433	22.7433	-0.11716	4.91429	22.9538	30.6741	32.2897	5.02755	1.36806	7.75687	3.10464	26.6395	6.11463	2.04205	18.6633	3.81153	35.804	30.3387	1.00399	68.5464	1.39143	52.3164	17.2129	2.16698	1.35229	17.1695	6.26712	3.52645	2.22702	0.355048	23.0897	0.821528	5.56374	2.52849	2.95943	3.13938	2.39332	5.29156
98	32.0042	18.8806	2.39285	0.548	0.705319	49.1237	55.4627	20.3349	73.6895	22.1056	51.0176	2.14199	25.8642	5.04213	7.35467	31.6756	37.6759	21.2522	3.28743	-2.79092	12.0195	0.285772	31.3009	8.57886	0.08704	17.7272	2.12972	33.1708	30.6092	-0.95575	96.4889	1.33219	50.0669	22.0476	1.65646	3.49178	16.0899	6.63667	1.00616	0.742159	1.91332	24.8372	2.20472	4.23775	-0.74432	3.97899	5.07777	2.58472	6.57025
99	32.4529	20.9696	5.82521	0.463847	-2.15354	52.6901	55.3863	3.46013	71.8995	30.8168	38.6064	1.06922	21.3359	11.283	5.87299	30.1286	39.0193	53.7859	3.48134	-3.63908	9.00501	-1.01173	39.5419	12.3585	1.70456	19.8019	3.44517	34.3644	30.9044	1.47337	45.6673	0.224897	51.732	23.1678	-0.4004	4.50065	13.9323	4.86069	8.70627	-0.395	1.72536	27.3015	2.02672	3.20564	-0.44325	4.86588	4.72799	2.97335	6.02046
100	55.461	21.1323	6.80984	-0.63047	-0.7037	51.3123	54.683	6.8602	68.4319	31.3597	20.2617	3.6978	19.3993	15.5148	2.06491	20.1478	33.7301	45.3123	4.05546	-3.52605	10.8763	0.305931	41.4645	7.03366	0.83555	20.0544	3.25521	36.4478	34.5986	2.89009	61.7329	0.873546	50.9383	23.6761	2.43848	3.00706	15.838	4.54472	16.3959	0.508555	1.97325	31.5365	3.86228	5.87652	-0.2003	6.70189	4.97044	3.91178	6.36926
101	70.7119	21.9391	22.8958	-0.34375	-0.31682	46.8158	56.0767	-0.88403	50.8332	35.1599	9.75708	-1.11936	13.9522	10.6956	3.22029	17.6346	40.7062	58.7019	2.85809	-4.15187	9.22714	-0.54785	40.8467	14.5365	0.816486	20.7845	3.52798	37.1354	32.1964	2.26711	28.5269	3.27598	51.2932	25.9297	1.79901	3.98545	16.35	5.96296	15.3207	2.10259	1.74308	33.4299	5.11937	4.17817	1.77143	8.76611	7.60399	3.32155	7.61533
102	73.9476	21.976	23.086	0.652371	1.33549	47.9494	56.4296	-6.69921	41.9817	35.1566	12.1407	3.97327	26.9804	18.8234	-0.61442	11.3406	35.852	63.5967	3.29296	5.08878	8.01633	-0.17605	41.3429	12.5906	9.88521	17.9077	2.74932	35.9696	35.3884	1.2809	19.9368	2.8072	56.2518	27.6389	0.872556	5.60679	14.6548	0.662181	21.0478	2.86093	3.19855	30.6471	5.29087	5.62703	3.3423	12.9014	7.82488	5.08416	7.2822
103	77.7326	23.0043	36.0155	1.75983	-1.51397	45.6535	55.8239	-0.16873	32.2871	38.1043	4.85309	55.5614	31.1385	21.5009	6.5011	9.6189	37.1201	73.9565	3.47962	12.449	6.8337	1.45447	40.7721	13.7831	8.00714	19.9436	4.06978	34.1528	36.4898	2.48989	33.3077	-0.03626	54.0974	28.4867	2.62533	4.96258	17.6143	0.921987	19.0972	2.25737	1.84274	30.0873	6.09741	9.057	3.15699	12.185	9.19924	4.05335	5.58576
104	79.0982	23.3857	34.5357	2.96336	1.8285	46.0533	55.5301	2.62621	17.5888	36.7069	3.11361	54.7407	31.2724	19.6531	2.22438	13.2451	37.0105	80.4113	2.43355	15.4837	12.7008	0.642506	40.9452	13.311	8.75449	19.3859	3.60191	33.323	35.766	2.59818	32.1272	1.81491	52.4041	31.3147	1.31548	5.17735	14.2707	6.07681	21.5021	4.23173	7.39377	35.554	6.19234	7.88605	7.12728	13.4038	12.7786	4.33135	5.27812
105	79.9061	23.634	47.0805	9.41244	-0.81718	47.3994	56.1377	0.497108	8.28419	38.0184	2.9453	28.6839	36.2719	11.7538	13.2561	24.4116	38.6621	82.2125	4.09989	17.8	11.4607	0.12854	40.6712	17.0514	9.62149	24.3306	4.96075	26.813	39.8564	2.94106	25.3545	3.30001	49.4325	28.1951	1.20965	2.99907	16.7991	3.77747	21.3065	5.12595	3.72782	31.3209	9.13673	7.85312	4.15138	14.348	11.27	6.59739	6.08567
106	76.9924	23.3691	37.6883	32.9456	2.49837	50.4733	56.2551	4.05961	5.82524	37.908	11.1119	62.4808	34.7421	20.5918	12.0124	24.7849	37.9171	86.9236	6.13902	21.2773	10.8546	-0.18772	41.0303	16.4867	8.15855	19.151	3.06154	22.3435	35.3617	1.89948	50.4835	3.79321	45.4904	27.5028	3.90916	4.22819	15.6875	2.28245	22.5861	3.26789	3.17245	36.2256	9.60377	8.187	5.16398	14.9511	20.542	7.35067	7.21238
107	77.8231	23.2174	38.9024	31.9079	0.611413	48.9014	54.8374	4.82369	2.34989	38.5795	28.7265	35.5962	39.0443	21.2455	11.4729	24.5207	37.2045	74.4005	6.41727	19.6998	12.5867	-0.44658	41.0207	19.0951	9.13521	19.8253	4.77695	15.0474	35.4432	2.87747	64.1903	3.97942	53.4523	25.9647	5.34129	2.79965	16.7005	3.51431	22.6317	2.39252	3.98083	35.3923	12.7736	10.0638	6.71432	14.4264	18.6219	6.76044	6.09637
108	74.4747	23.1713	45.4149	18.005	2.08216	43.3613	56.1824	5.44253	10.3832	36.4551	32.9291	69.4395	38.4543	18.4457	10.8134	16.8562	38.0641	64.6017	7.26872	22.0671	11.6104	0.95686	41.122	20.7583	8.65883	23.9456	4.73104	29.6263	36.1352	4.05721	64.8501	4.44466	55.9506	29.13	14.9427	4.15552	16.4386	2.07793	24.8192	2.85383	2.47858	35.7169	14.8903	10.5633	3.46889	12.6049	18.1585	5.43373	3.749
109	74.747	22.4444	58.0631	15.261	18.9732	45.674	55.7234	9.08209	40.1322	37.1558	42.421	53.3367	37.7169	27.3055	14.6215	12.8292	32.4468	82.0188	6.49566	21.318	14.0445	1.36435	41.0756	19.784	13.1982	26.4773	3.86523	32.4066	39.4591	4.43555	63.6552	8.71465	55.3741	26.8514	15.587	2.5059	17.3554	4.90808	21.444	3.05386	2.97733	38.906	10.3628	15.729	1.68812	13.1203	13.5284	5.11332	6.38446
110	79.6197	23.6249	64.7945	31.3122	7.4406	47.9522	54.9109	6.49446	57.1138	36.4623	73.2941	75.5246	39.5036	24.2903	13.802	21.2663	34.1927	70.0192	8.18226	23.0333	13.8072	-0.79148	40.8667	19.6392	18.2545	20.0894	3.59704	32.1995	42.1756	8.43647	65.2754	3.40789	51.1454	26.4748	18.2887	5.34257	17.9356	3.4621	26.29	9.38647	8.81581	35.2107	12.833	15.37	4.06656	10.6116	13.445	3.8957	6.06796
111	77.6549	23.0592	71.3223	32.2512	7.08821	51.2293	55.432	2.93598	51.2883	35.6599	76.0388	81.3067	42.9492	23.7939	14.2348	30.5038	37.3344	68.0203	8.53626	20.3504	9.35932	0.295078	40.6174	19.9277	21.6964	25.0915	5.4341	35.3824	41.8107	11.264	54.9184	4.76991	51.6793	28.3474	18.9679	4.2059	16.285	9.49011	26.8971	8.20834	10.7982	34.0496	14.0052	12.6744	3.21018	12.0698	15.08	2.92489	6.33295
112	79.8705	23.5423	72.4175	22.4401	33.6234	53.1181	54.9943	7.78044	39.8976	37.4302	72.8472	74.5149	43.3894	25.718	19.847	36.2041	36.922	68.2758	8.86143	21.675	13.1192	1.15159	40.4034	21.2637	23.4002	26.2829	3.94985	39.5673	43.0449	14.5611	101.655	5.74563	56.2143	27.2176	24.9499	2.90846	15.1173	10.7292	29.1602	13.2761	19.665	35.4249	13.8295	10.5043	4.79066	13.1047	16.7054	4.76797	6.41688
113	81.7701	23.9113	73.3361	17.3427	26.5176	51.6548	55.8893	7.27032	57.3628	35.4644	74.1144	105.822	40.5473	26.0094	23.6566	35.6154	33.6752	70.852	9.43065	20.8633	15.5695	0.252424	40.7805	23.8884	21.3538	24.1368	3.74761	40.9655	43.323	19.3051	118.386	6.64003	52.7721	28.1104	25.6293	3.43614	16.8763	11.4587	27.9254	16.6022	22.8408	33.7572	13.2729	10.0445	5.07367	14.1104	15.6647	3.47642	6.54481
114	80.6449	23.6831	73.0957	12.6695	64.8018	50.8684	56.4562	10.2631	61.9956	39.5196	74.989	120.829	43.8112	32.8817	23.3005	42.5256	38.2655	56.9247	10.373	22.1854	14.3882	0.074589	41.4566	22.7928	20.2292	28.7297	4.494	44.6737	39.7145	24.6525	124.718	8.65738	54.9964	24.6134	27.1615	5.72491	16.4924	8.78724	30.5022	13.5545	17.344	34.1775	13.9581	11.256	3.12977	12.8498	12.4039	4.6879	7.74066
115	82.1724	23.8242	72.4692	24.0735	70.4319	50.059	56.4555	13.5229	63.6622	31.532	74.3963	120.777	39.6734	35.451	20.8883	43.3528	33.4736	58.3957	9.10035	20.2739	15.745	1.65059	40.7698	21.803	23.535	26.5884	4.41609	43.348	38.4841	30.1622	126.463	10.7178	55.3266	27.8567	22.9053	2.22246	15.6689	7.36004	28.5233	8.17779	11.5982	33.7472	12.977	12.0271	9.37547	13.4197	11.6634	4.02989	7.68873
116	81.8296	24.4013	73.409	38.6908	64.8889	55.8234	55.6835	12.9282	65.1918	35.9101	71.9545	122.024	39.9166	39.0162	24.331	38.0895	33.0968	58.416	9.95747	20.6598	15.5211	0.094123	40.577	22.5126	22.1137	28.2619	3.34373	39.1476	43.2639	30.7155	124.651	7.85649	54.4042	25.4621	27.0083	2.79954	15.6376	13.266	30.4704	9.70637	12.6587	36.7526	13.1635	12.1339	6.48805	13.353	16.9147	3.97106	7.66416
117	82.3759	23.9831	75.5812	45.4964	71.6819	52.247	55.8119	8.04546	60.2388	39.1309	76.8156	121.46	45.8636	40.1886	25.477	36.6084	33.1438	45.4349	8.51154	18.6702	12.7696	0.230789	40.7362	19.5957	22.1224	25.4175	4.22257	41.4307	39.7094	29.512	123.426	8.20105	56.3158	20.848	30.2247	3.6	15.0713	15.8643	31.6873	15.9273	20.8435	34.0882	11.1374	10.9629	8.23184	13.6192	15.7674	6.69355	7.21938
118	80.2455	24.4548	74.676	62.9105	74.0283	53.7084	56.4965	14.232	67.233	37.7484	73.9393	120.296	37.7195	39.5331	20.5007	37.4294	32.365	44.9794	7.6233	20.7774	14.4873	-0.70252	41.2719	20.5122	21.0107	27.4048	5.21057	41.9606	40.7937	35.1037	126.935	10.3803	55.3469	17.5658	29.2298	3.45778	16.2148	18.2851	31.1366	17.8538	25.0806	33.7987	17.3444	10.4788	5.42361	14.4723	17.1972	6.02921	7.70188
119	81.2505	24.0977	75.1604	64.7883	85.2687	54.8988	56.2071	16.5631	61.6376	36.7625	71.6051	115.871	47.3122	38.1785	26.0488	38.2733	34.2571	42.8252	8.04594	20.9598	16.3003	0.062774	40.7684	21.6146	21.8875	27.8426	3.44062	41.9153	37.6291	35.7379	126.238	9.95822	55.7548	13.4277	31.0668	2.92412	16.4981	19.3157	31.771	15.4807	23.0161	36.2463	15.2677	18.8251	3.84459	11.7227	18.8863	5.94935	7.25551
120	81.2889	24.4149	74.5576	66.6192	89.0755	56.129	56.5	18.4975	41.2031	38.4759	72.1231	119.16	48.0897	39.5165	25.4577	36.1991	34.185	59.4226	8.52143	19.4583	16.8508	-0.62927	40.6426	19.6672	21.7801	27.8392	4.48136	40.9827	31.2465	35.3422	126.718	8.84224	54.551	25.7779	33.1254	1.70831	16.3164	13.8884	33.1596	16.3671	23.8235	34.8818	14.4394	15.4724	1.63998	13.375	9.3929	7.46144	8.41826
121	83.4758	25.1829	73.7001	65.2195	92.5189	53.6236	55.95	14.6218	26.0332	42.0608	69.3526	120.684	45.2868	42.523	17.9447	40.1682	32.5499	67.7656	8.85925	18.7987	12.9639	-1.91555	41.0018	21.3451	21.2088	30.892	5.05842	43.1395	26.5987	35.1934	126.833	8.85376	53.904	26.1255	33.0353	1.8012	15.8055	8.13615	31.5856	18.1312	25.5966	40.1577	15.3433	11.9903	5.79671	13.7937	15.6662	6.15513	8.50927
122	82.9694	25.7317	71.7751	66.3134	90.4143	56.2014	55.3674	13.1868	15.5419	39.5162	72.4392	123.385	42.5007	42.5328	14.8414	40.1247	34.1938	60.7835	8.70244	19.2668	16.6969	2.1977	41.2786	21.8371	21.8729	25.758	4.40892	41.2229	17.4769	34.8248	126.964	6.71906	55.1847	27.6346	30.9824	1.18795	17.2097	6.72119	32.662	15.9785	22.6396	33.4012	13.7745	13.4608	3.60287	14.8785	18.4092	6.13299	7.51068
123	83.1504	24.8064	72.0287	66.0545	88.6332	55.6486	55.6958	12.5617	10.5282	41.8231	73.0903	119.991	43.7237	44.8372	10.8494	43.0298	37.2466	66.2896	8.24911	18.6539	13.4124	1.68932	41.0506	20.9693	21.4764	28.3743	4.56891	41.8798	17.3592	31.7076	124.583	7.26915	53.9988	25.0867	32.2656	1.04651	16.81	17.4654	31.808	16.066	25.7011	34.4308	13.019	13.5339	5.43532	14.112	20.8706	6.15338	8.76014
124	82.3274	24.983	68.8292	67.0913	86.6256	55.5654	51.8256	9.83032	8.22081	39.3146	68.0121	120.438	41.8844	45.3175	1.69426	38.9888	36.4958	67.7172	7.57412	21.4622	13.3481	5.16068	41.4367	22.0375	21.0295	29.2422	3.39899	42.822	13.6034	34.0568	117.559	8.5724	55.0824	20.6517	30.6292	0.606937	17.0195	18.5213	33.6138	17.8853	24.407	36.3348	13.8531	13.79	3.76285	13.5091	22.2401	6.21077	7.56341
125	82.7227	25.8723	68.7001	67.2639	90.0708	57.5444	51.2213	12.4861	4.74632	41.9083	66.6817	121.228	38.749	44.2152	1.10354	40.4198	35.3189	73.5217	7.64629	25.1596	14.0637	21.0712	41.5318	21.5854	20.9109	29.7905	5.58477	44.9061	11.5856	35.3941	109.035	8.5513	56.0313	17.1715	35.5288	1.11999	17.8251	16.0434	33.3814	15.9378	25.2148	38.1868	13.788	16.1895	1.35702	13.9468	26.2288	7.39475	7.85165
126	80.5559	25.2721	70.6118	67.319	87.4565	54.3833	45.8513	7.15489	2.3043	36.7142	69.6168	120.558	37.4242	43.8822	4.27134	38.3351	33.2599	62.9788	7.56939	23.7343	15.5734	32.1679	41.5665	23.8344	21.5427	28.9478	4.06195	46.1423	8.79485	34.4007	95.9532	6.21397	56.8276	12.9404	34.9207	0.116849	17.6092	10.4133	33.4383	16.6627	25.7601	35.6545	12.5012	15.5311	4.58312	14.2751	25.207	6.83766	8.04887
127	81.7403	25.6064	69.5054	65.782	89.3008	54.8108	41.7756	0.844365	3.85428	38.6504	70.2643	120.038	40.7198	41.807	4.38117	29.4768	37.2087	78.4056	8.33093	19.1378	15.4929	25.1927	41.6447	20.2805	22.0834	30.9885	3.03637	40.8555	8.89839	35.5147	79.6679	7.9465	55.9633	13.5035	37.0238	1.92628	16.7172	16.693	32.9936	18.3351	26.191	34.3205	13.6925	11.9885	3.99404	14.0222	24.2811	8.40337	8.12296
128	82.4056	25.2292	67.5146	67.1585	89.2082	51.9643	37.1469	4.67801	2.21889	33.1991	65.9334	120.823	37.4108	40.8448	5.57221	24.0851	35.4169	79.5229	9.5243	20.8477	16.6366	27.7656	41.3082	22.9319	23.7312	29.3625	3.12156	44.5356	7.43367	35.1222	79.4744	5.98755	53.705	20.3292	32.4773	1.04771	17.5195	12.1382	32.5255	16.1424	25.0676	30.183	15.7482	11.1882	4.81329	13.6076	24.6221	10.7791	11.286
129	81.096	25.5899	66.2288	65.6344	90.2832	53.8964	31.0161	7.35885	0.333098	38.4794	68.678	122.43	31.2946	43.6136	1.13891	14.66	35.9543	84.0848	8.81481	21.3626	13.3681	52.4243	41.6896	23.1413	23.8276	29.7842	2.19185	38.958	4.96932	33.751	102.973	3.65675	53.9269	20.4465	30.5121	-0.00671	18.2725	8.71336	33.9469	19.392	25.6452	28.5599	12.1173	11.9898	3.37554	13.1048	20.3771	10.8308	10.9564
130	81.9294	24.5179	63.9028	67.8938	91.747	52.6379	29.1183	2.4962	1.91815	39.2652	61.5891	121.103	36.3792	44.0936	1.45169	15.0508	33.7197	83.2109	10.0289	21.66	16.0893	48.5552	41.8625	22.0264	23.4739	31.5553	2.87983	38.3248	5.31106	35.8745	81.7687	6.66423	55.6206	17.4803	30.5103	1.16736	18.2738	12.8892	33.2559	17.9318	25.3144	24.7369	14.5989	10.9673	2.44646	12.7611	21.0507	8.90824	15.0536
131	82.0442	25.9068	66.905	68.0855	92.9211	51.9138	26.3051	5.9422	15.1008	37.6936	65.9713	122.643	33.8837	43.1432	17.0178	10.8485	37.8564	81.8051	9.45958	19.7434	17.691	24.3013	42.0796	25.875	17.9508	29.1034	2.09559	36.8701	4.92507	32.6695	88.0005	7.7036	52.8876	14.6288	32.913	1.64769	18.635	22.0868	34.2598	19.015	26.6135	20.4965	12.8117	10.5119	6.05582	12.6124	19.6366	9.79361	10.8601
132	82.633	26.0961	68.7071	66.9542	91.6567	56.4672	22.0248	7.77752	24.4763	33.0156	64.6996	121.685	30.3697	43.6449	15.7235	11.1722	39.4885	82.3655	9.78271	20.9204	17.681	12.0769	41.7339	21.8941	23.5679	30.493	-0.57717	39.4034	6.025	35.7406	106.822	8.17009	53.5229	13.58	35.958	1.17304	18.0876	16.435	33.6328	21.7711	26.1448	17.9434	14.3278	9.77834	6.76213	14.1256	21.0533	9.39342	10.2811
133	83.1634	25.7269	70.6559	67.1884	90.9519	56.0939	21.1535	6.62063	14.6255	28.4209	58.5751	121.745	29.9182	44.0539	27.5246	16.0137	31.7497	73.2711	10.2547	22.1071	16.9607	4.15723	41.8903	20.2847	20.6294	28.7431	0.951533	41.8231	4.56442	35.5087	108.837	9.43806	53.5433	11.398	36.393	1.17222	18.6879	9.93094	32.9314	20.0258	27.3832	15.3304	13.9598	10.8173	6.65877	12.5837	17.2017	8.95821	9.69742
134	81.0827	25.5736	69.38	67.2173	90.6924	58.1056	20.7489	5.54691	11.059	23.1479	55.9726	119.921	31.9094	41.6129	22.4888	26.586	34.2972	63.4382	8.54076	21.4153	15.4409	1.67846	41.7264	22.0056	21.6836	27.7035	1.44834	34.7479	4.60762	37.6877	99.6112	13.2139	53.1562	10.3829	34.8924	-0.39034	18.9171	5.57941	32.8625	19.9323	27.3302	9.15059	14.0554	13.8771	8.59359	13.1885	10.4641	9.54669	10.2435
135	82.3242	24.9759	66.7025	67.3665	89.4755	60.4544	14.9804	12.886	5.67712	30.1197	44.944	122.763	37.6785	44.1971	15.5668	30.9646	35.5529	45.593	8.34432	23.0186	13.5468	3.96037	41.361	25.2138	20.3036	28.2182	-2.81911	33.9819	3.71465	38.107	116.234	11.8681	55.2351	6.34054	34.7156	-2.39913	18.4905	3.00958	33.1398	21.5879	26.5554	11.6555	11.9007	11.9292	9.31469	14.2957	14.0315	9.37311	9.03557
136	78.4514	24.6576	55.4492	65.4844	84.118	58.0956	16.6616	-0.53252	51.894	37.5567	32.6667	116.705	34.1612	35.9168	12.5511	20.7508	31.7772	42.9362	8.46182	19.3326	11.7081	2.15799	42.1572	20.698	14.1249	24.3496	-1.93061	32.8072	4.52639	36.7604	84.0997	14.1094	52.0288	7.10575	34.3441	-1.01975	17.706	3.61978	30.7568	17.8619	24.7321	12.4967	13.2598	15.6656	9.18879	13.8983	16.8283	11.2809	7.93578
137	65.9428	24.6036	39.3293	66.4878	72.825	54.8452	14.1224	6.76278	40.1304	40.0089	24.814	105.363	36.4504	30.2506	6.56814	15.6025	32.162	37.1494	8.82856	17.1819	14.8258	-1.36356	42.6604	22.2534	9.96805	19.8384	-3.93116	36.0463	1.33185	37.4795	100.368	13.2573	53.1956	11.2661	35.2704	-0.57186	18.5097	3.66639	28.4043	17.388	24.8365	6.42015	10.182	11.452	8.60209	13.2885	11.2051	10.2223	6.6267
138	56.8962	25.2459	27.5729	64.0716	61.5373	55.6051	16.5786	13.815	24.6024	34.6538	20.3843	86.2997	31.1287	26.8755	5.12831	12.388	31.1274	33.3383	9.97169	18.3943	14.4955	-0.30091	43.0472	19.8438	8.09468	16.5777	-3.03182	34.7805	2.03219	37.2585	123.677	14.8307	47.4081	5.68332	35.3567	-0.60363	17.8791	3.60501	22.3149	16.3659	25.2453	8.80561	6.84198	12.6301	8.4604	13.0341	10.2401	11.0306	6.3722
139	49.8019	24.9965	19.9989	64.4347	46.7945	53.1	14.1226	16.0718	14.9465	39.9345	15.6617	62.3907	32.5735	23.0527	3.33381	10.4095	33.5763	21.9235	9.60376	14.2603	16.6956	-0.49618	42.743	20.4948	3.35584	12.639	-5.88982	38.4223	3.29577	35.2581	123.442	16.5124	43.094	9.48668	35.1464	-2.13145	18.1597	2.59094	22.8455	15.9802	22.7208	6.88579	7.74055	11.5199	5.27848	10.639	6.9049	9.89888	7.55408
140	41.2871	23.9808	11.6716	63.1106	37.1479	50.6003	14.4719	17.8154	9.94066	35.7255	13.1313	47.7828	30.1248	21.0631	0.056285	7.04978	30.5523	31.8806	9.22811	12.8901	18.033	0.586453	43.0666	19.6513	2.95137	9.47692	-4.75434	34	2.78385	37.4529	126.122	13.9932	37.2223	6.78957	33.263	-0.29604	17.9054	4.86812	18.1876	18.7403	24.3016	8.36112	7.90497	10.3525	5.21337	12.5522	4.97609	9.78675	6.58511
141	49.9366	22.9916	13.3397	59.4131	29.8132	47.7806	13.5245	15.118	4.96903	27.2389	12.6842	32.7127	29.5404	18.1349	-2.65431	7.46522	29.4793	42.6844	10.2684	7.18948	16.9984	9.3915	43.2804	16.1661	3.6738	8.4489	0.140414	39.9912	5.59783	35.7897	125.519	14.5488	33.2488	6.84556	32.75	-0.4786	17.1754	3.07489	16.4709	16.5284	27.2824	7.27169	5.88991	9.92613	5.47534	13.2398	2.8477	11.2622	7.2745
142	70.3388	22.5778	9.27784	51.0868	21.0109	46.5496	12.8456	15.9927	4.87082	27.012	10.7519	26.3803	29.365	15.23	2.40574	3.72292	24.1177	55.0029	7.96762	4.68222	16.3008	2.80166	43.0632	22.3647	0.948746	8.77017	4.66632	37.0793	-0.03984	38.3424	126.263	13.1656	30.7127	6.38543	30.8123	1.84384	17.2232	4.03121	13.7947	17.3214	23.8347	5.16456	11.9936	10.687	6.55484	12.5863	12.009	9.54754	5.41668
143	79.1795	21.5799	8.8074	45.2683	14.0072	44.3651	13.608	15.1061	56.7157	34.6181	10.5555	20.1709	31.0118	13.2906	3.89375	4.5233	29.0102	69.9725	5.56644	2.97834	12.5196	-0.47831	43.1902	20.7106	0.904392	7.06651	2.65096	36.9279	3.56327	35.4441	126.527	14.7463	54.8338	4.81245	29.7145	-0.399	16.6526	2.18888	11.7607	17.3264	24.0221	5.63496	11.1385	9.9377	4.4412	10.9608	12.7202	11.1782	7.07908
144	69.6356	20.0145	9.20971	38.3474	11.7044	43.2414	13.3867	15.0596	45.7327	37.728	14.1634	17.4384	35.12	17.0933	5.14434	4.21565	24.7121	58.4469	3.51393	5.29785	9.26871	-1.95464	42.2065	16.7425	-1.88045	6.28102	3.26348	39.4944	2.64594	37.0627	126.674	13.697	57.0201	4.54069	28.7939	0.855709	17.2456	18.72	12.8037	16.6256	23.9503	5.23134	11.3873	11.2307	11.6058	11.1539	18.7144	9.90543	5.72014
145	68.894	19.0513	17.7792	28.1581	12.3011	39.5046	11.3604	17.2383	49.1576	35.9585	11.0991	12.3723	39.4518	17.5932	4.34426	1.44858	23.8038	40.7803	8.61058	-0.88355	8.45641	-1.89587	42.2876	23.0996	1.87451	10.0657	2.93614	36.0682	1.96956	37.8042	125.069	13.045	51.7201	8.25544	28.0581	3.04772	18.2971	16.17	12.9042	16.1667	24.1681	2.22821	9.04629	11.9631	7.53986	11.6717	15.1673	9.58418	5.2592
146	65.6655	18.4796	25.0685	22.2235	8.48165	36.2299	11.676	13.1724	57.1862	25.4264	12.701	10.6606	37.2608	19.7817	5.63377	1.08504	21.9658	22.2138	9.40121	1.47711	7.80188	-3.41315	42.1067	18.5388	-0.62616	11.7892	3.56752	38.5905	2.08715	38.4432	124.657	14.8199	46.5291	5.12063	25.099	3.15871	17.8906	12.9495	11.9918	14.2347	25.1802	1.83973	7.33012	11.2739	6.73334	10.0681	16.7578	9.84482	5.2588
147	67.7277	16.1458	46.0979	19.396	8.13377	35.0043	11.6029	12.6637	41.0505	28.0975	12.4611	13.8759	30.5219	22.0824	0.256845	2.11797	22.5708	25.3465	7.3931	0.396085	6.29628	-2.72347	41.3792	15.4351	0.297861	13.541	3.97131	41.014	2.45322	36.0465	121.603	10.2782	40.1486	6.86487	24.5448	4.9335	17.768	9.58218	20.3161	16.2688	24.7796	9.11505	4.21592	8.46943	7.95099	9.60864	14.8757	7.66068	4.61562
148	74.063	14.6606	51.2195	16.4495	8.46555	29.6397	11.4098	13.8789	27.8972	30.7219	32.9502	9.605	33.5026	23.5806	2.48757	-0.64672	25.0642	43.6844	6.81887	4.8229	7.33667	-2.91073	41.045	21.9059	-1.68157	15.597	2.96988	38.7742	2.19316	36.4114	121.75	11.0804	51.0837	11.324	18.289	3.40699	17.2776	8.16868	19.2471	14.9052	21.8091	4.57864	7.84038	12.7549	6.11327	11.4985	15.4173	8.96322	3.08024
149	68.6427	14.0562	48.9649	15.0659	8.59512	37.1784	10.626	10.2058	16.5062	31.7072	57.2615	8.02553	34.0065	19.7447	2.29576	3.45863	25.3642	34.2192	4.49754	2.87377	12.3451	-2.30821	40.859	17.7039	2.14953	14.658	4.47904	33.1021	2.82949	35.98	121.257	13.003	54.6754	12.5813	21.1686	3.47934	16.9398	12.1131	15.4346	16.4203	24.594	5.51536	7.66784	10.7209	4.94345	9.87025	12.1458	7.12503	2.89603
150	73.8925	10.7939	45.4556	11.1048	6.01492	41.5646	9.71058	12.0127	25.5864	26.4887	57.6487	7.29583	26.4301	21.5193	3.69654	3.48474	22.1482	30.7496	4.67197	3.8089	12.1981	-2.18261	40.6163	22.5907	0.151929	15.3244	2.56544	32.6279	3.5791	34.4614	119.327	13.2352	53.2786	10.9157	24.1802	1.98928	16.6018	9.50412	15.6421	18.3037	25.2162	7.75193	10.6352	11.1872	6.61783	10.3545	14.701	8.69475	2.42255
151	66.9268	10.6083	40.2878	11.7345	6.5296	41.051	9.7436	9.70025	53.1702	20.3749	52.9007	10.2693	30.8147	17.9839	4.50949	3.03929	27.5704	37.8189	3.94987	1.19867	11.7144	0.261542	39.1745	18.7305	-0.90466	19.3571	2.19757	31.3422	3.18195	33.7752	119.134	10.8086	48.2327	7.51585	31.6067	4.91989	16.5471	4.80374	15.3439	14.5653	23.1162	8.89819	8.54677	9.52322	5.2195	6.50888	14.5803	8.85425	0.996101
152	62.798	9.55658	37.2428	11.4619	8.65044	36.7343	9.83142	7.08223	48.5695	17.2367	43.185	4.5302	29.1466	24.6803	6.79551	0.465868	25.5878	34.3766	7.0383	0.307934	11.5907	0.40493	39.5141	12.437	0.131736	16.2071	1.86282	36.1983	2.29933	33.0894	108.019	13.2217	45.4567	8.03697	31.3109	4.58165	17.2895	2.47775	18.3137	11.6804	20.302	13.9064	5.40964	10.1011	8.543	8.46105	9.1704	7.83936	1.61515
153	75.082	9.08317	36.0824	10.042	3.35045	35.4989	7.35093	7.77845	38.6561	9.15035	33.6674	7.43863	19.8829	22.3523	17.8706	1.89152	26.1514	42.9005	8.99386	-3.30193	10.8176	-0.87643	38.332	10.8211	2.82085	21.7226	2.96655	29.9723	2.98851	35.3056	108.955	11.1035	40.6324	9.37593	29.3015	4.74545	15.8777	6.8421	24.7106	17.5645	22.3602	11.9807	7.30104	10.1974	7.77445	6.87666	10.5039	7.64909	2.68502
154	76.0786	7.91808	40.3135	9.95377	30.559	37.8833	6.16858	9.22797	55.0657	28.1236	40.1304	5.65764	27.4437	22.9618	25.224	-0.31892	23.1801	27.3126	7.68838	-1.02908	9.31812	8.46359	37.2275	8.15623	0.684403	15.8638	2.87228	23.652	1.86273	35.6886	99.2313	11.4769	36.9352	6.70982	23.0623	4.52593	15.0728	3.57988	25.83	12.7149	22.0559	13.4875	6.52822	10.5738	2.84268	5.78762	10.4939	8.36856	3.51827
155	74.0606	7.37737	48.4069	7.79212	25.7406	42.0276	7.53025	7.28358	37.6029	36.8062	36.9681	5.68222	27.9922	21.1478	21.853	5.15387	24.4035	30.2795	7.89044	0.353065	9.01838	6.11272	36.5648	8.24812	3.08971	21.2032	2.85719	18.0302	1.20981	36.4353	82.3182	9.33791	31.0884	6.30828	20.1645	2.07135	17.8219	2.71823	22.6092	17.1722	25.2007	18.9379	5.11	11.053	5.42368	6.23561	13.6234	6.67297	5.47775
156	64.9146	7.52267	54.6186	8.75289	16.2893	42.5137	7.78472	10.5283	22.9414	33.4609	31.0825	4.76361	32.7211	19.746	24.3004	4.46256	20.1198	53.9135	7.05871	-2.68021	9.7998	9.23403	36.2953	18.2049	0.608634	16.8152	1.23377	31.3761	-0.63296	34.5732	95.2584	6.71668	29.5885	4.62101	16.6662	2.89201	17.5338	5.95132	20.5961	16.8282	24.0028	21.2557	7.2399	9.36488	4.73297	3.73257	6.49937	6.95743	9.68413
157	72.2526	7.8435	53.7255	7.97739	11.3941	39.6546	7.34024	10.5381	13.6376	28.4254	19.9987	6.61351	33.7698	25.5673	33.9417	3.85292	21.7605	46.7281	5.12968	0.088563	9.59299	5.1401	34.9603	15.1289	-0.84589	17.6934	2.53505	25.15	1.87314	31.285	87.4614	4.24647	23.9372	7.20116	21.3251	1.7929	17.2789	8.41923	19.6054	13.9727	23.1268	20.5891	9.08033	10.0655	6.09907	5.72632	17.3696	7.82395	9.67198
[truncated: 113 more columns]

## Sheet: 7e
Average number of cells from 3 sections per animal
	Sham			Phenol denervation
	Mouse#1	Mouse#2	Mouse#3	Mouse#1	Mouse#2	Mouse#3
Duodenum	35.6667	35	24.1667	1.66667	1	2.83333
Pancreas	23	23.8333	29.1667	5.83333	4.33333	6.33333
